# Supplementary material for: Unusual Vilasinin-Class Limonoids from Trichilia rubescens
Source: MDPI journal article supplement (doi:10.3390/molecules29030651), 2024-01-30
Supplement: s1 [file s1]

# Supporting Information

## Unusual Vilasinin-Class Limonoids from *Trichilia rubescens*

Saidanxia Amuti <sup>1</sup>, Yohei Saito <sup>1</sup>, Shuichi Fukuyoshi <sup>1</sup>, Katsunori Miyake <sup>2</sup>, David J. Newman <sup>3</sup>, Barry R. O'Keefe <sup>3,4</sup>, Kuo-Hsiung Lee <sup>5,6,†</sup> and Kyoko Nakagawa-Goto <sup>1,5,\*</sup>

<sup>1</sup> School of Pharmaceutical Sciences, College of Medical, Pharmaceutical and Health Sciences, Kanazawa University, Kanazawa 920-1192, Japan; saidanxia@stu.kanazawa-u.ac.jp (S.A.); saito-y@staff.kanazawa-u.ac.jp (Y.S.); fukuyosi@p.kanazawa-u.ac.jp (S.F.)

<sup>2</sup> School of Pharmacy, Tokyo University of Pharmacy and Life Sciences, Hachioji 192-0392, Japan; miyake@toyaku.ac.jp

<sup>3</sup> Natural Products Branch, Developmental Therapeutics Program, Center of Cancer Research, Division of Cancer Treatment and Diagnosis, National Cancer Institute, Frederick, MD 21702-1201, USA; dn22a@nih.gov (D.J.N.); okeefeba@mail.nih.gov (B.R.O.)

<sup>4</sup> Molecular Targets Program, Center for Cancer Research, Division of Cancer Treatment and Diagnosis, National Cancer Institute, Frederick, MD 21702-1201, USA

<sup>5</sup> Natural Products Research Laboratories, UNC Eshelman School of Pharmacy, University of North Carolina at Chapel Hill, Chapel Hill, NC 27599-7568, USA; khlee@unc.edu

<sup>6</sup> Chinese Medicine Research and Development Center, China Medical University and Hospital, 2 Yuh-Der Road, Taichung 40447, Taiwan

\* Correspondence: kngoto@p.kanazawa-u.ac.jp

† Deceased 24 October 2021.

## List of Contents

|                                                                                                                        |     |
|------------------------------------------------------------------------------------------------------------------------|-----|
| Figure S1. NCI-60 Human tumor cell line assay data for the crude organic extract of <i>T. rubescens</i> (N047159)..... | S1  |
| Figure S2. <sup>1</sup> H NMR spectrum of compound <b>1</b> in CDCl <sub>3</sub> at 600MHz.....                        | S2  |
| Figure S3. <sup>13</sup> C NMR spectrum of compound <b>1</b> in CDCl <sub>3</sub> at 150MHz.....                       | S2  |
| Figure S4. HMQC spectrum of compound <b>1</b> in CDCl <sub>3</sub> at 600MHz.....                                      | S3  |
| Figure S5. HMBC spectrum of compound <b>1</b> in CDCl <sub>3</sub> at 600MHz.....                                      | S3  |
| Figure S6. COSY spectrum of compound <b>1</b> in CDCl <sub>3</sub> at 600MHz.....                                      | S4  |
| Figure S7. NOESY spectrum of compound <b>1</b> in CDCl <sub>3</sub> at 600MHz.....                                     | S4  |
| Figure S8. UV spectrum of compound <b>1</b> in MeOH .....                                                              | S5  |
| Figure S9. IR spectrum of compound <b>1</b> .....                                                                      | S5  |
| Figure S10. <sup>1</sup> H NMR spectrum of compound <b>2</b> in CDCl <sub>3</sub> at 600MHz.....                       | S6  |
| Figure S11. <sup>13</sup> C NMR spectrum of compound <b>2</b> in CDCl <sub>3</sub> at 150MHz.....                      | S6  |
| Figure S12. HMQC spectrum of compound <b>2</b> in CDCl <sub>3</sub> at 600MHz.....                                     | S7  |
| Figure S13. HMBC spectrum of compound <b>2</b> in CDCl <sub>3</sub> at 600MHz.....                                     | S7  |
| Figure S14. COSY spectrum of compound <b>2</b> in CDCl <sub>3</sub> at 600MHz.....                                     | S8  |
| Figure S15. NOESY spectrum of compound <b>2</b> in CDCl <sub>3</sub> at 600MHz.....                                    | S8  |
| Figure S16. <sup>1</sup> H NMR spectrum of compound <b>3</b> in CDCl <sub>3</sub> at 600MHz.....                       | S9  |
| Figure S17. <sup>13</sup> C NMR spectrum of compound <b>3</b> in CDCl <sub>3</sub> at 150MHz.....                      | S9  |
| Figure S18. HMQC spectrum of compound <b>3</b> in CDCl <sub>3</sub> at 600MHz.....                                     | S10 |
| Figure S19. HMBC spectrum of compound <b>3</b> in CDCl <sub>3</sub> at 600MHz.....                                     | S10 |
| Figure S20. COSY spectrum of compound <b>3</b> in CDCl <sub>3</sub> at 600MHz.....                                     | S11 |
| Figure S21. NOESY spectrum of compound <b>3</b> in CDCl <sub>3</sub> at 600MHz.....                                    | S11 |
| Figure S22. <sup>1</sup> H NMR spectrum of compound <b>4</b> in CDCl <sub>3</sub> at 600MHz.....                       | S12 |
| Figure S23. <sup>13</sup> C NMR spectrum of compound <b>4</b> in CDCl <sub>3</sub> at 150MHz.....                      | S12 |
| Figure S24. HMQC spectrum of compound <b>4</b> in CDCl <sub>3</sub> at 600MHz.....                                     | S13 |
| Figure S25. HMBC spectrum of compound <b>4</b> in CDCl <sub>3</sub> at 600MHz.....                                     | S13 |
| Figure S26. COSY spectrum of compound <b>4</b> in CDCl <sub>3</sub> at 600MHz.....                                     | S14 |
| Figure S27. NOESY spectrum of compound <b>4</b> in CDCl <sub>3</sub> at 600MHz.....                                    | S14 |
| Figure S28. UV spectrum of compound <b>4</b> in MeOH .....                                                             | S15 |
| Figure S29. IR spectrum of compound <b>4</b> .....                                                                     | S15 |
| Figure S30. <sup>1</sup> H NMR spectrum of compound <b>5</b> in CDCl <sub>3</sub> at 600MHz.....                       | S16 |
| Figure S31. <sup>13</sup> C NMR spectrum of compound <b>5</b> in CDCl <sub>3</sub> at 150MHz.....                      | S16 |
| Figure S32. HMQC spectrum of compound <b>5</b> in CDCl <sub>3</sub> at 600MHz.....                                     | S17 |
| Figure S33. HMBC spectrum of compound <b>5</b> in CDCl <sub>3</sub> at 600MHz.....                                     | S17 |
| Figure S34. COSY spectrum of compound <b>5</b> in CDCl <sub>3</sub> at 600MHz.....                                     | S18 |
| Figure S35. NOESY spectrum of compound <b>5</b> in CDCl <sub>3</sub> at 600MHz.....                                    | S18 |
| Figure S36. UV spectrum of compound <b>5</b> in MeOH .....                                                             | S19 |
| Figure S37. IR spectrum of compound <b>5</b> .....                                                                     | S19 |

|                                                                                                   |     |
|---------------------------------------------------------------------------------------------------|-----|
| Figure S38. $^1\text{H}$ NMR spectrum of compound <b>6</b> in $\text{CDCl}_3$ at 600MHz.....      | S20 |
| Figure S39. $^{13}\text{C}$ NMR spectrum of compound <b>6</b> in $\text{CDCl}_3$ at 150MHz.....   | S20 |
| Figure S40. HMQC spectrum of compound <b>6</b> in $\text{CDCl}_3$ at 600MHz.....                  | S21 |
| Figure S41. HMBC spectrum of compound <b>6</b> in $\text{CDCl}_3$ at 600MHz.....                  | S21 |
| Figure S42. COSY spectrum of compound <b>6</b> in $\text{CDCl}_3$ at 600MHz.....                  | S22 |
| Figure S43. NOESY spectrum of compound <b>6</b> in $\text{CDCl}_3$ at 600MHz.....                 | S22 |
| Figure S44. UV spectrum of compound <b>6</b> in MeOH .....                                        | S23 |
| Figure S45. IR spectrum of compound <b>6</b> .....                                                | S23 |
|                                                                                                   |     |
| Figure S46. $^1\text{H}$ NMR spectrum of compound <b>7</b> in $\text{CDCl}_3$ at 600MHz.....      | S24 |
| Figure S47. $^{13}\text{C}$ NMR spectrum of compound <b>7</b> in $\text{CDCl}_3$ at 150MHz.....   | S24 |
| Figure S48. HMQC spectrum of compound <b>7</b> in $\text{CDCl}_3$ at 600MHz.....                  | S25 |
| Figure S49. HMBC spectrum of compound <b>7</b> in $\text{CDCl}_3$ at 600MHz.....                  | S25 |
| Figure S50. COSY spectrum of compound <b>7</b> in $\text{CDCl}_3$ at 600MHz.....                  | S26 |
| Figure S51. NOESY spectrum of compound <b>7</b> in $\text{CDCl}_3$ at 600MHz.....                 | S26 |
| Figure S52. UV spectrum of compound <b>7</b> in MeOH .....                                        | S27 |
| Figure S53. IR spectrum of compound <b>7</b> .....                                                | S27 |
|                                                                                                   |     |
| Figure S54. $^1\text{H}$ NMR spectrum of compound <b>8</b> in $\text{CDCl}_3$ at 600MHz.....      | S28 |
| Figure S55. $^{13}\text{C}$ NMR spectrum of compound <b>8</b> in $\text{CDCl}_3$ at 150MHz.....   | S28 |
| Figure S56. HMQC spectrum of compound <b>8</b> in $\text{CDCl}_3$ at 600MHz.....                  | S29 |
| Figure S57. HMBC spectrum of compound <b>8</b> in $\text{CDCl}_3$ at 600MHz.....                  | S29 |
| Figure S58. COSY spectrum of compound <b>8</b> in $\text{CDCl}_3$ at 600MHz.....                  | S30 |
| Figure S59. NOESY spectrum of compound <b>8</b> in $\text{CDCl}_3$ at 600MHz.....                 | S30 |
| Figure S60. UV spectrum of compound <b>8</b> in MeOH .....                                        | S31 |
| Figure S61. IR spectrum of compound <b>8</b> .....                                                | S31 |
|                                                                                                   |     |
| Figure S62. $^1\text{H}$ NMR spectrum of compound <b>17</b> in $\text{CDCl}_3$ at 600 MHz.....    | S32 |
| Figure S63. $^{13}\text{C}$ NMR spectrum of compound <b>17</b> in $\text{CDCl}_3$ at 150 MHz..... | S32 |
|                                                                                                   |     |
| Figure S64. LC/MS Analysis of compound <b>1</b> .....                                             | S33 |
| Figure S65. LC/MS Analysis of fraction 7.2.....                                                   | S34 |
|                                                                                                   |     |
| Figure S66. Structures of TS1 and TS2.....                                                        | S34 |

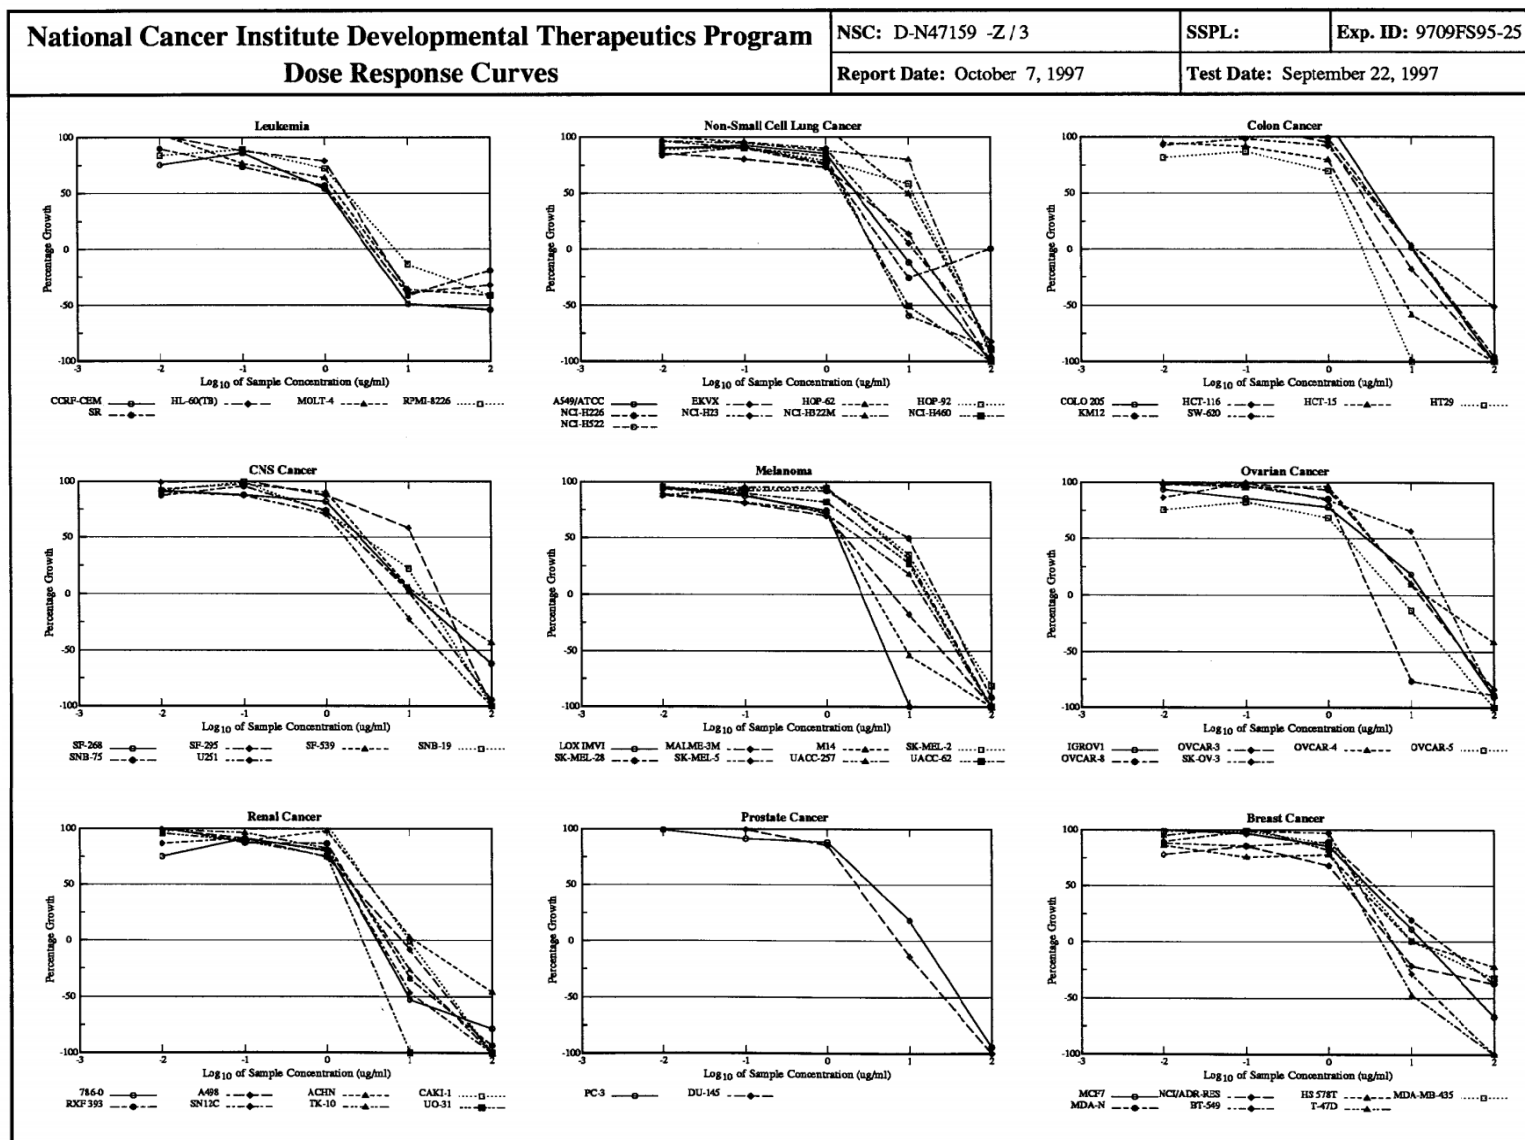

Figure S1. NCI-60 Human tumor cell line assay data for the crude organic extract of *T. rubescens* (N047159)

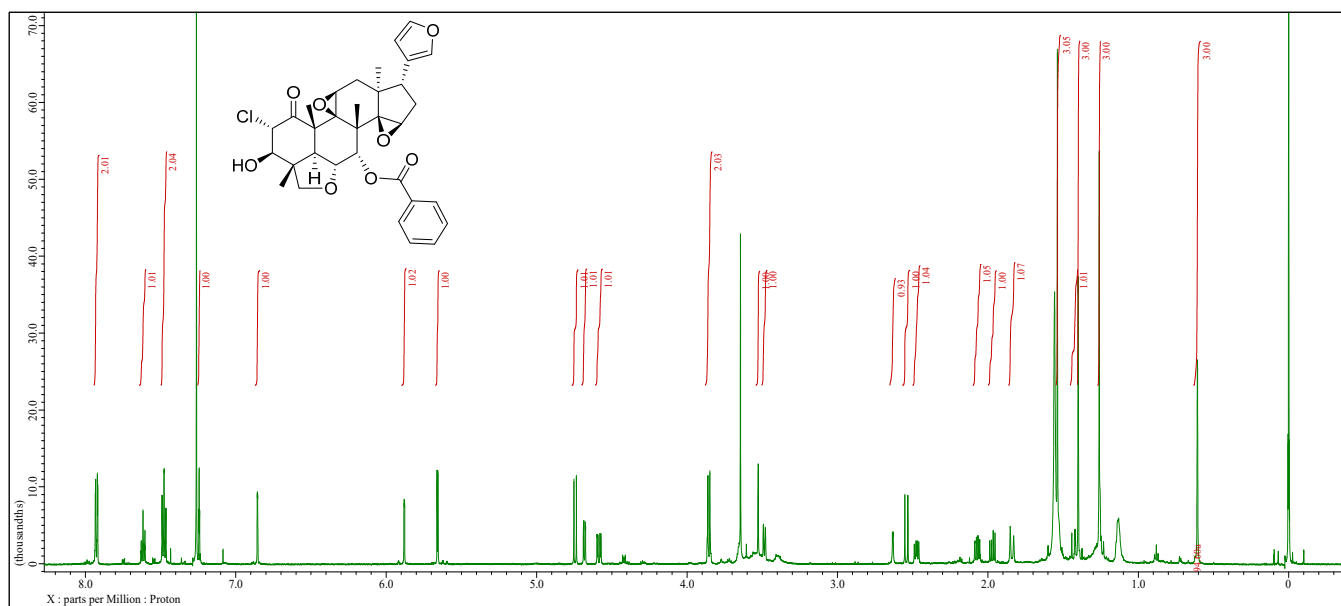

Figure S2. <sup>1</sup>H NMR spectrum of compound **1** in CDCl<sub>3</sub> at 600MHz

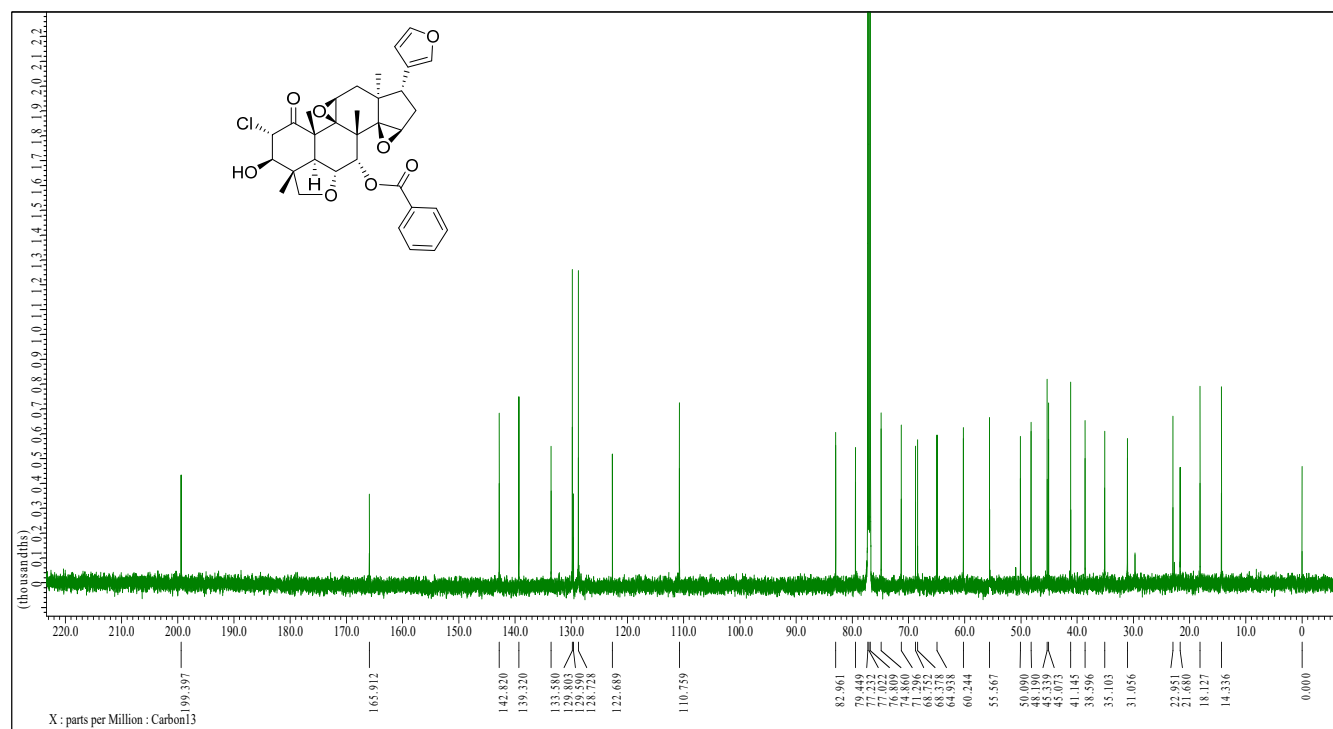

Figure S3. <sup>13</sup>C NMR spectrum of compound **1** in CDCl<sub>3</sub> at 150MHz

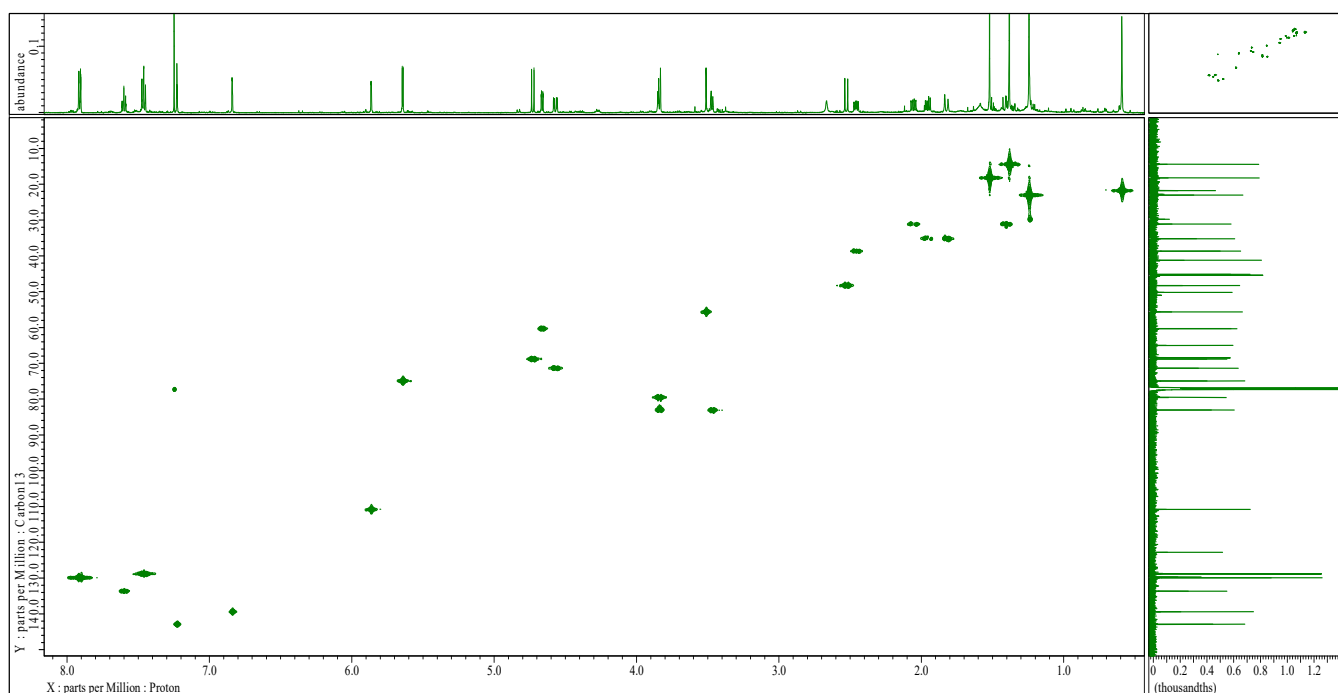

Figure S4. HMQC spectrum of compound **1** in CDCl<sub>3</sub> at 600MHz

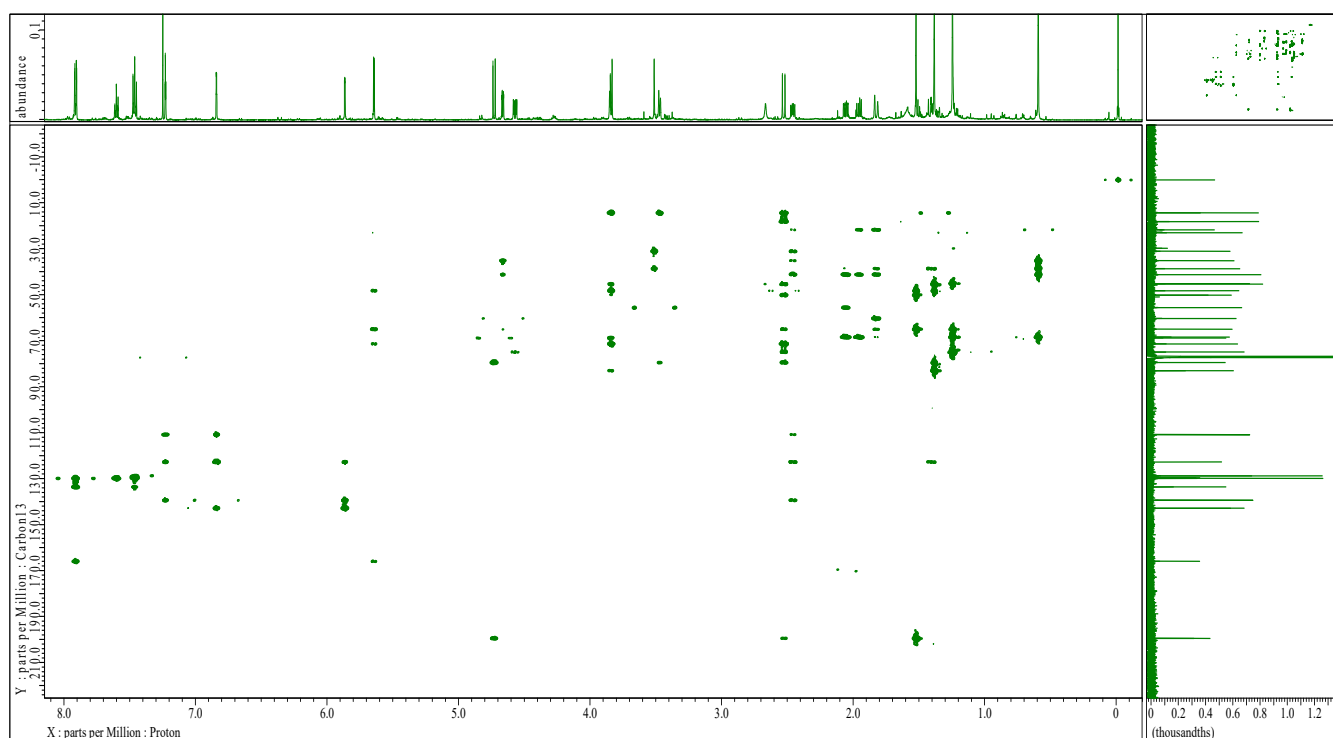

Figure S5. HMBC spectrum of compound **1** in CDCl<sub>3</sub> at 600MHz

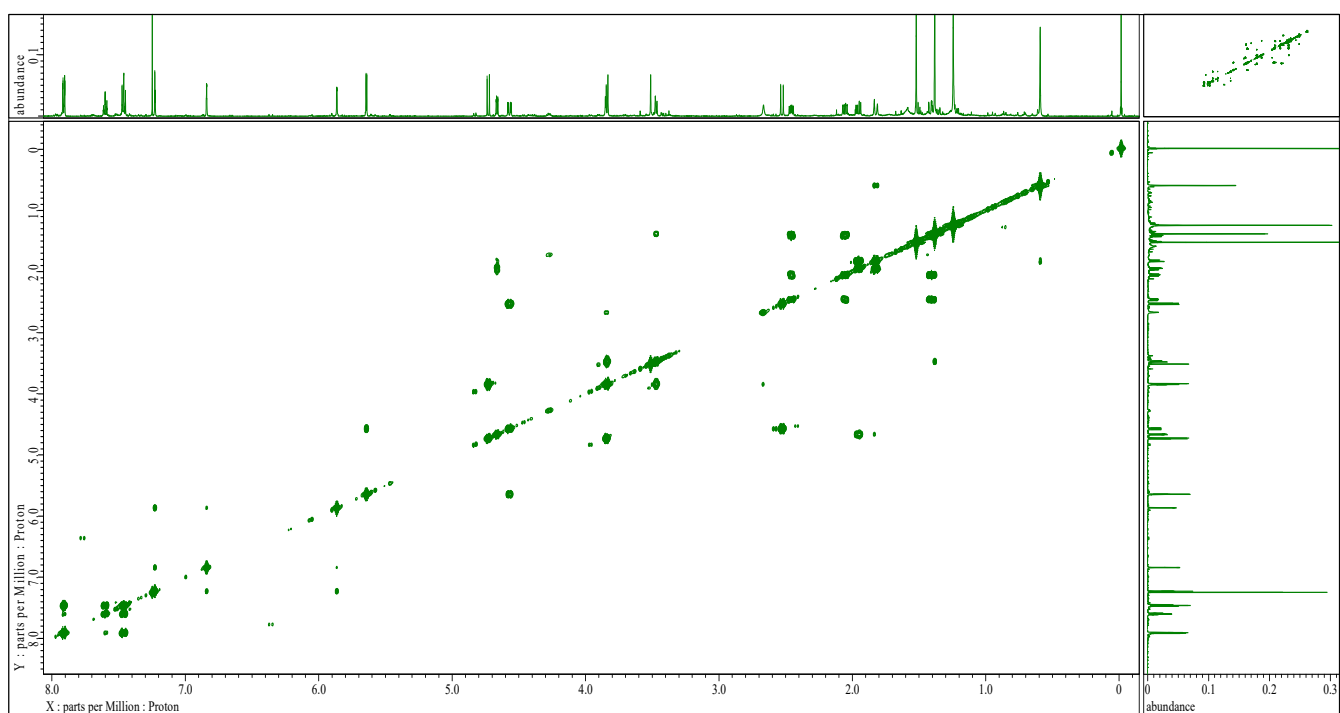

Figure S6. COSY spectrum of compound **1** in CDCl<sub>3</sub> at 600MHz

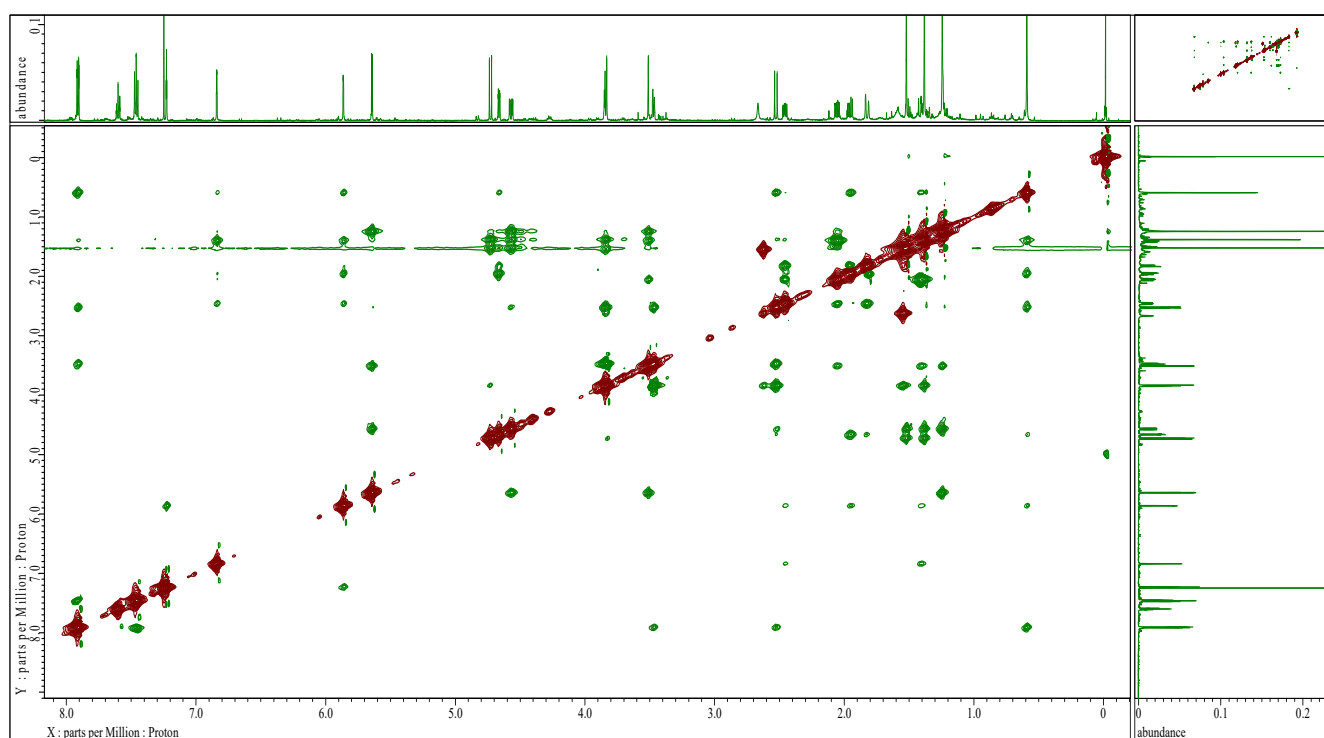

Figure S7. NOESY spectrum of compound **1** in CDCl<sub>3</sub> at 600MHz

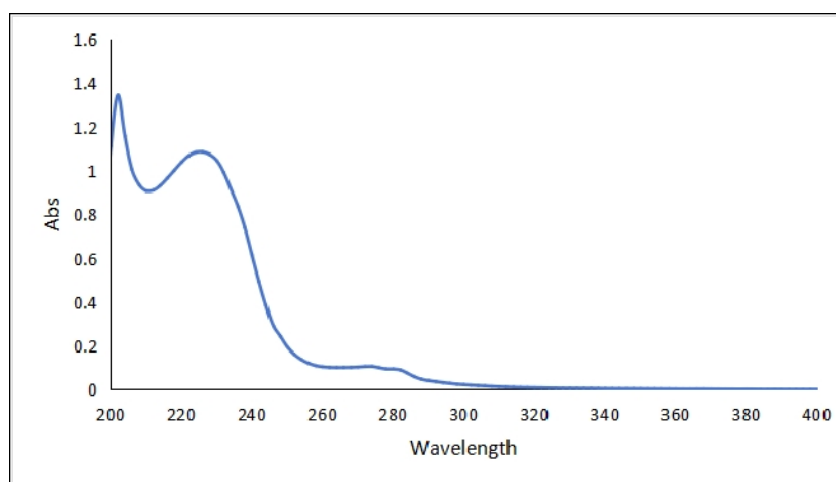

Figure S8. UV spectrum of compound **1** in MeOH

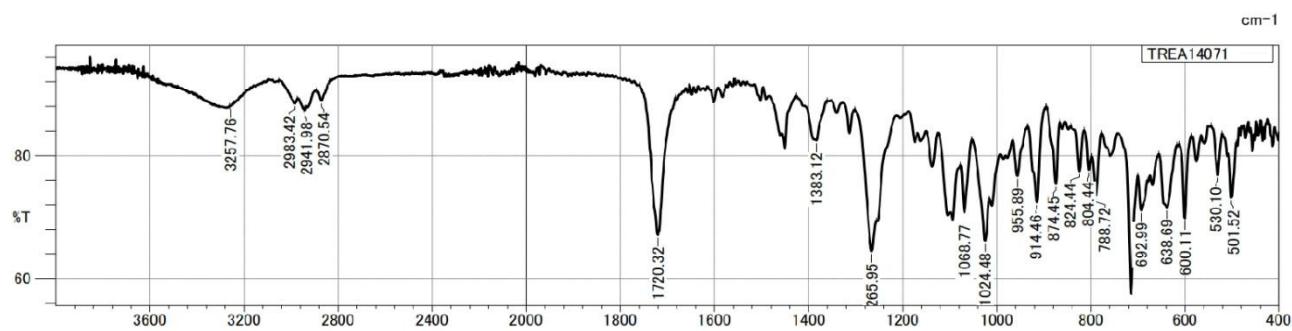

Figure S9. IR spectrum of compound **1**



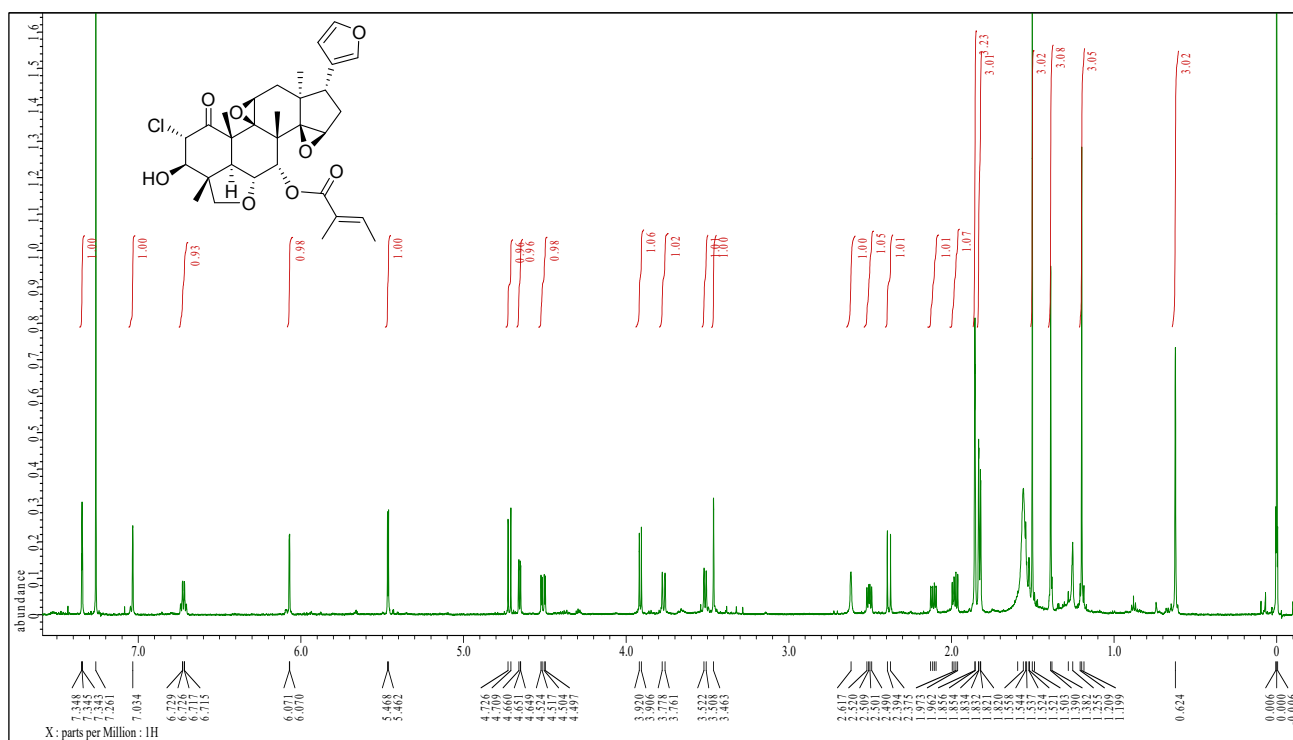

Figure S10. <sup>1</sup>H NMR spectrum of compound **2** in CDCl<sub>3</sub> at 600MHz

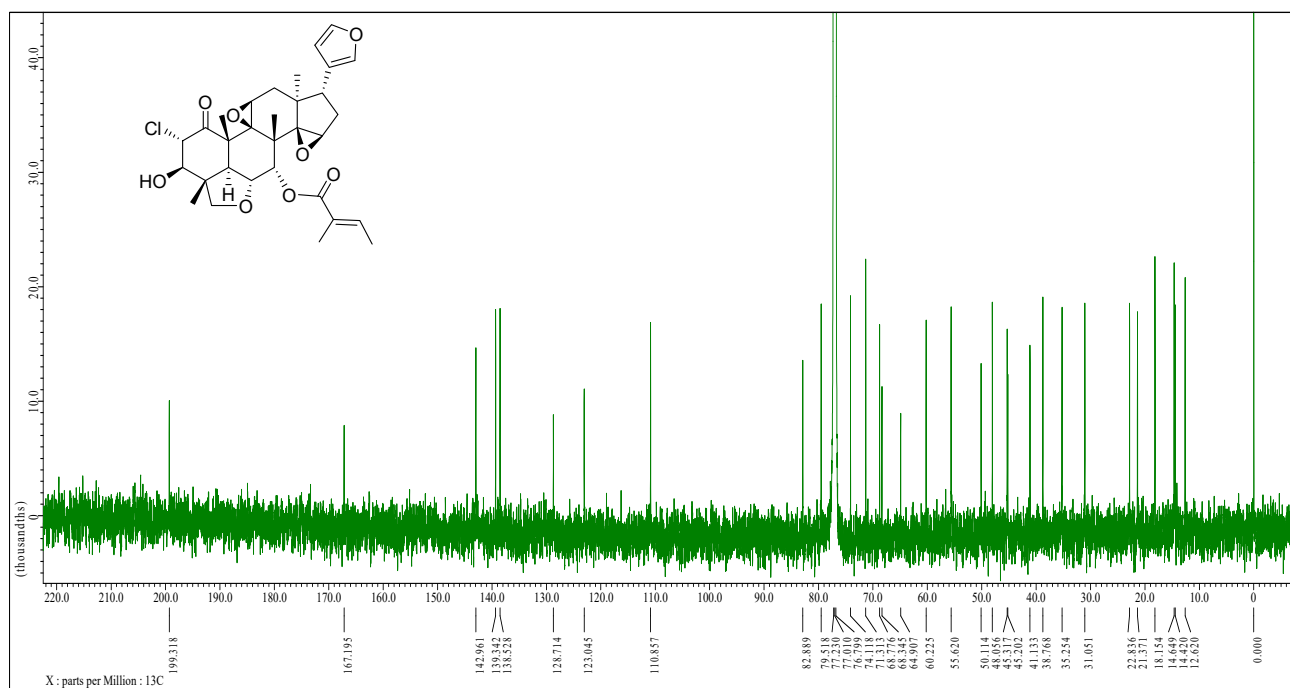

Figure S11. <sup>13</sup>C NMR spectrum of compound **2** in CDCl<sub>3</sub> at 150MHz

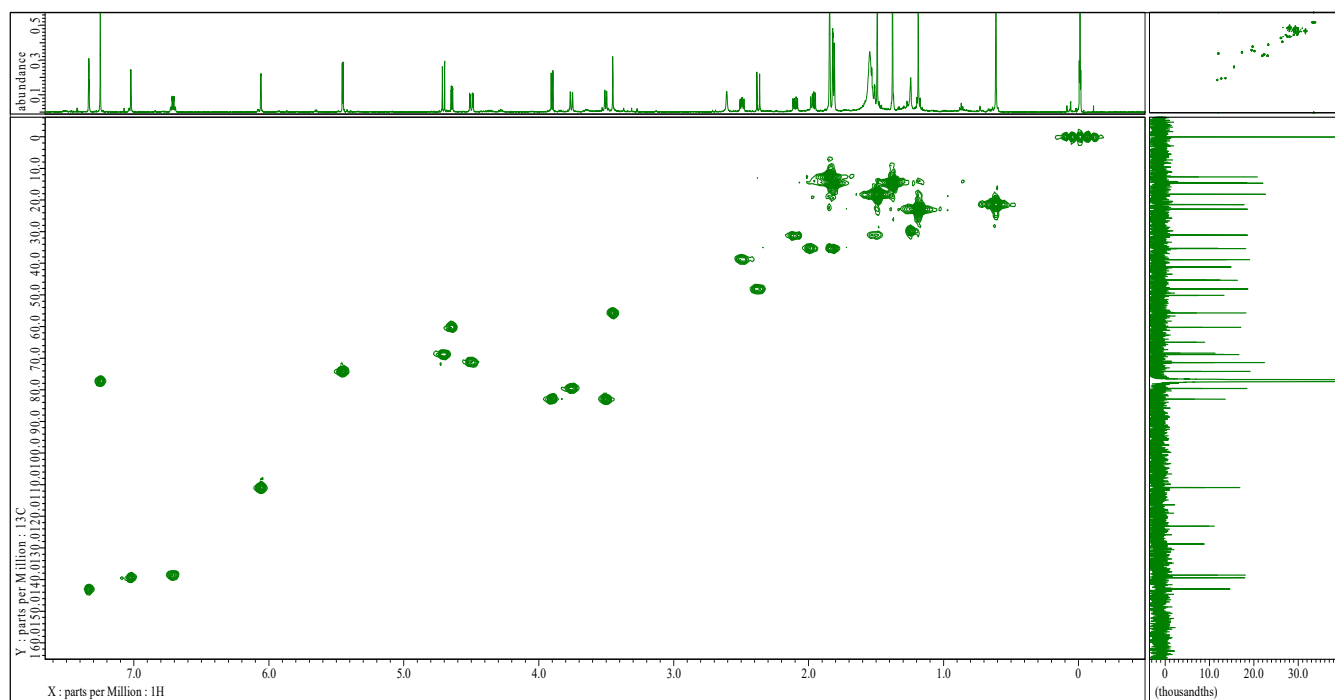

Figure S12. HMQC spectrum of compound **2** in CDCl<sub>3</sub> at 600MHz

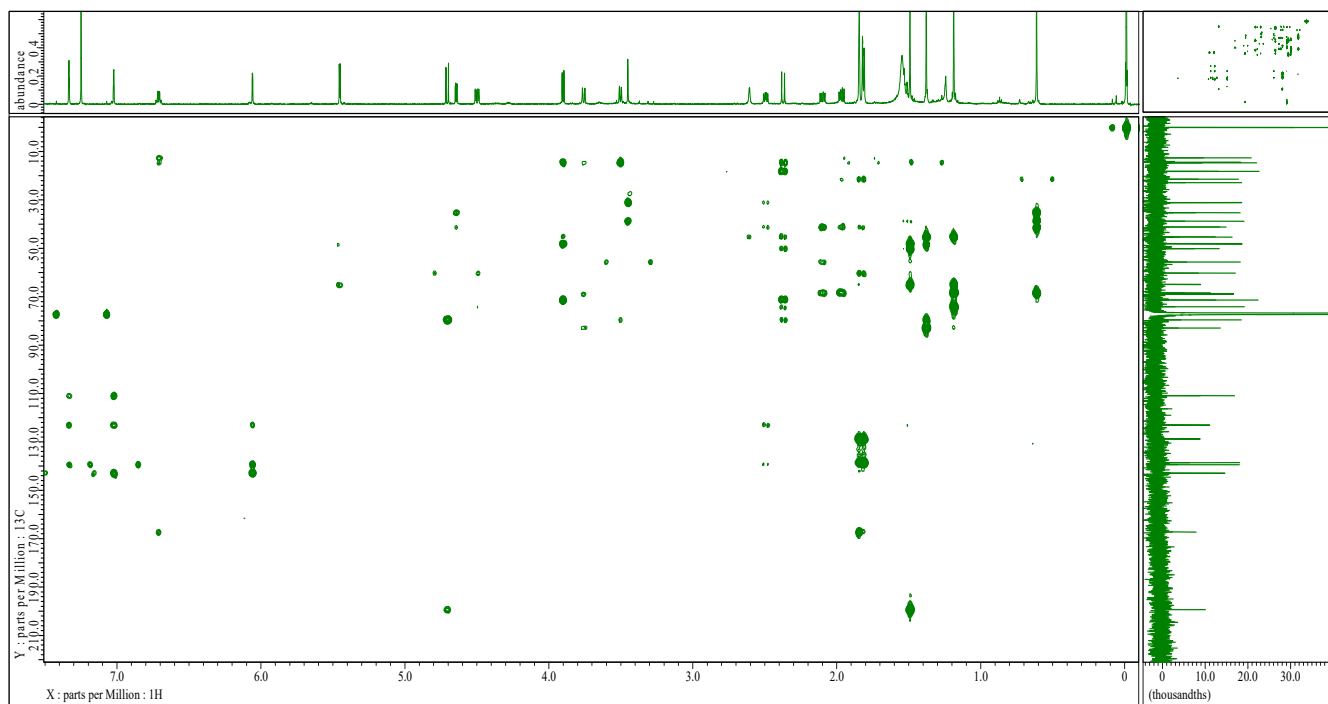

Figure S13. HMBC spectrum of compound **2** in CDCl<sub>3</sub> at 600MHz

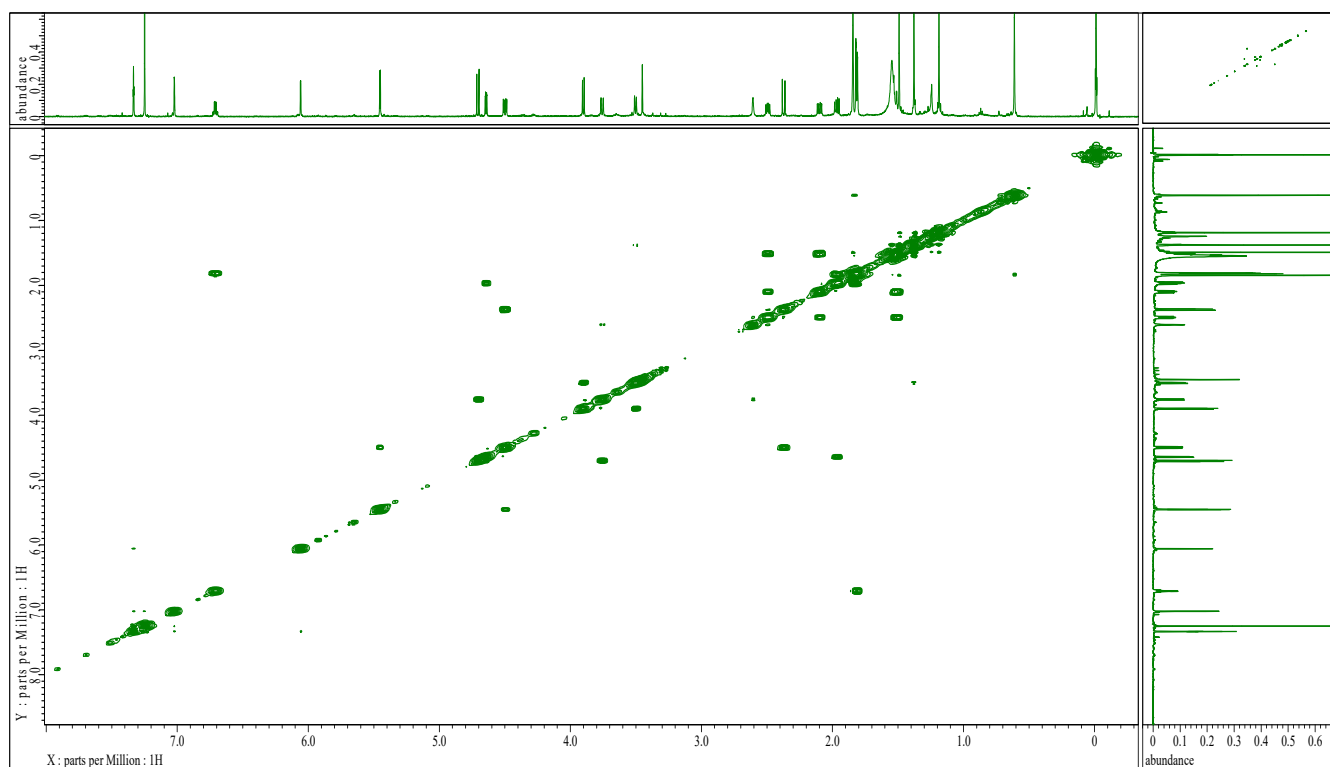

Figure S14. COSY spectrum of compound **2** in CDCl<sub>3</sub> at 600MHz

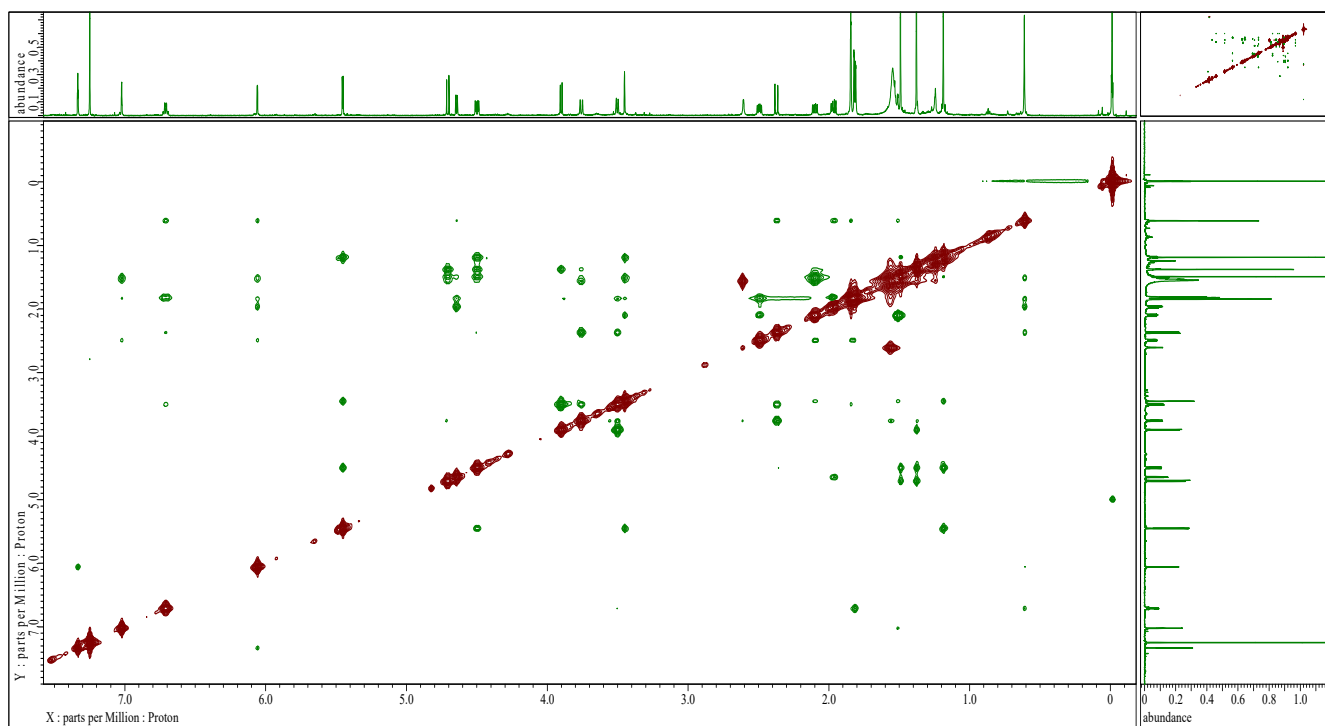

Figure S15. NOESY spectrum of compound **2** in CDCl<sub>3</sub> at 600MHz

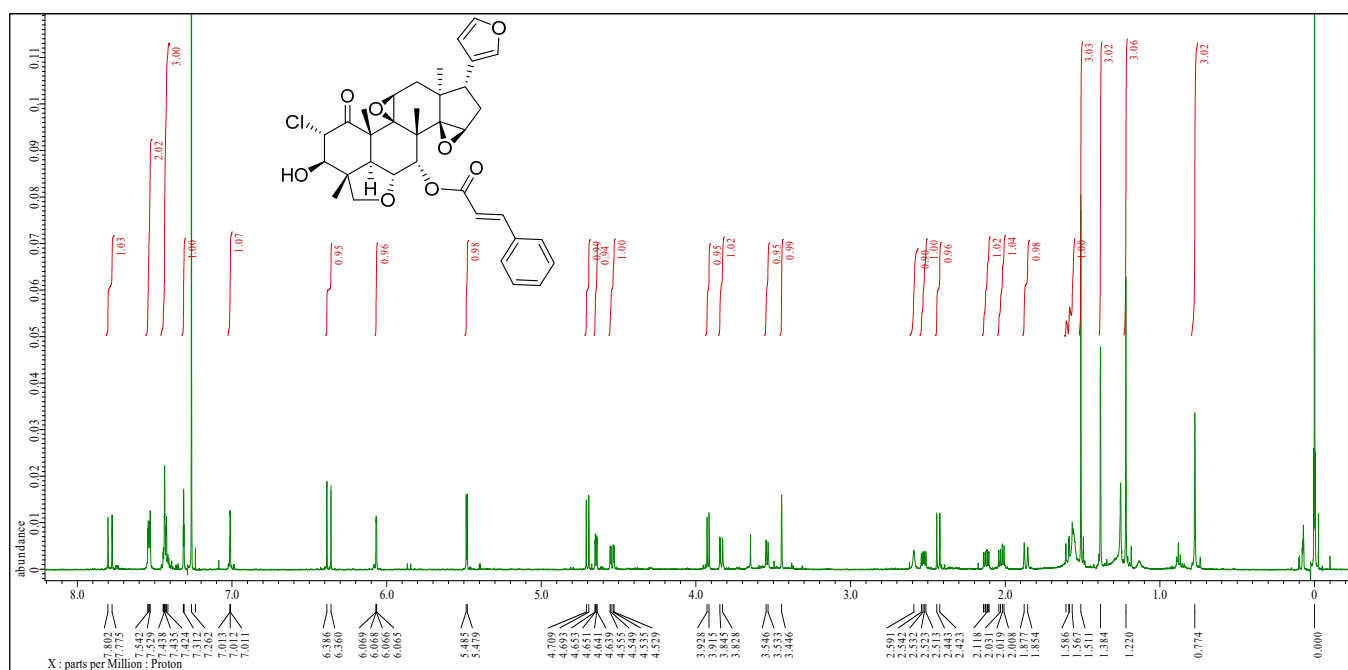

Figure S16. <sup>1</sup>H NMR spectrum of compound **3** in CDCl<sub>3</sub> at 600MHz

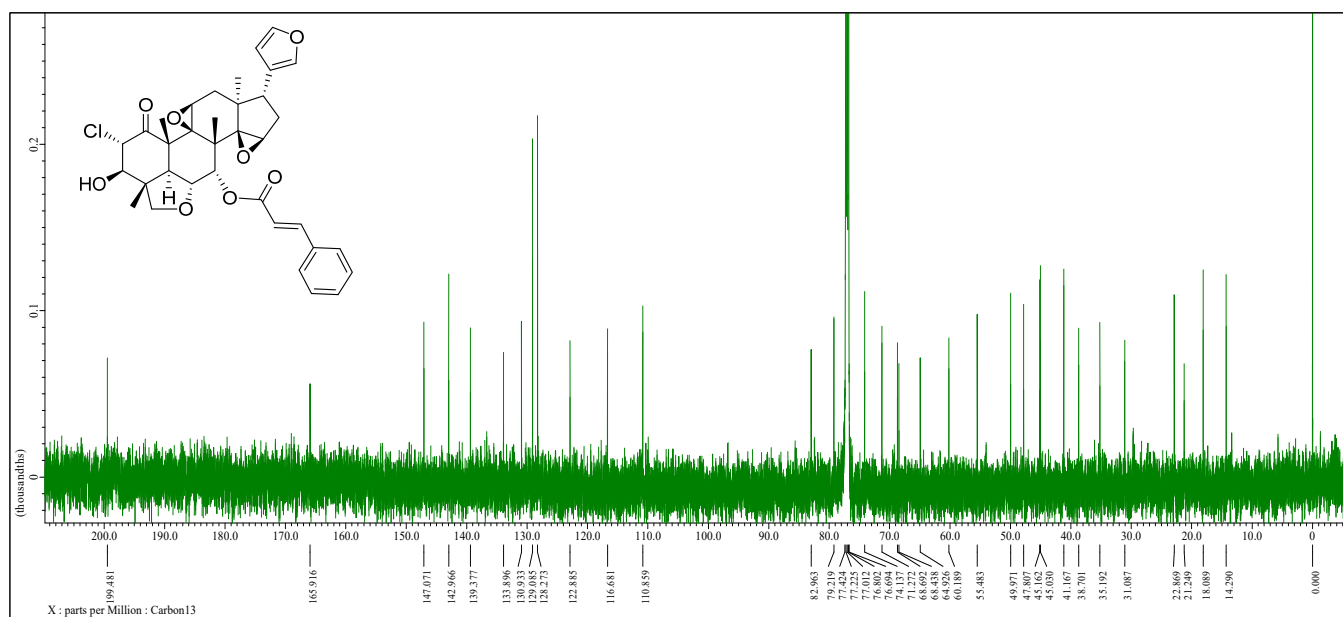

Figure S17. <sup>13</sup>C NMR spectrum of compound **3** in CDCl<sub>3</sub> at 150MHz

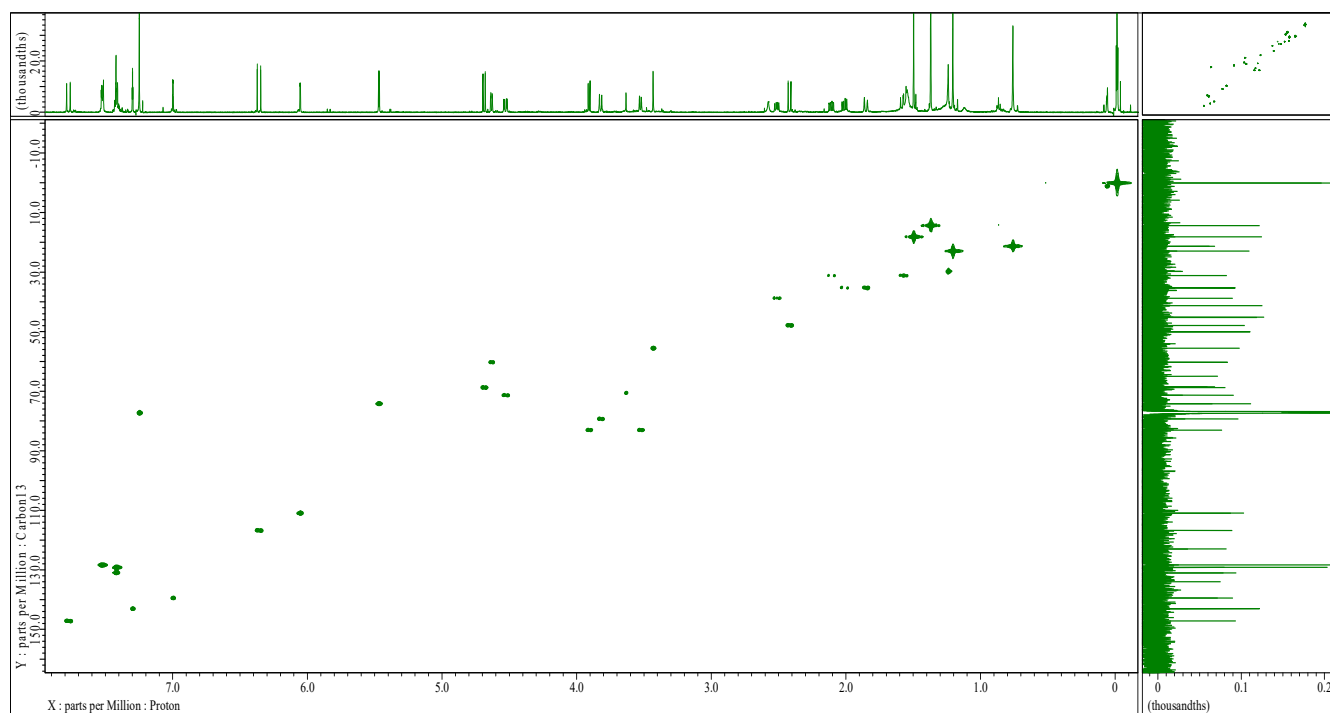

Figure S18. HMQC spectrum of compound **3** in CDCl<sub>3</sub> at 600MHz

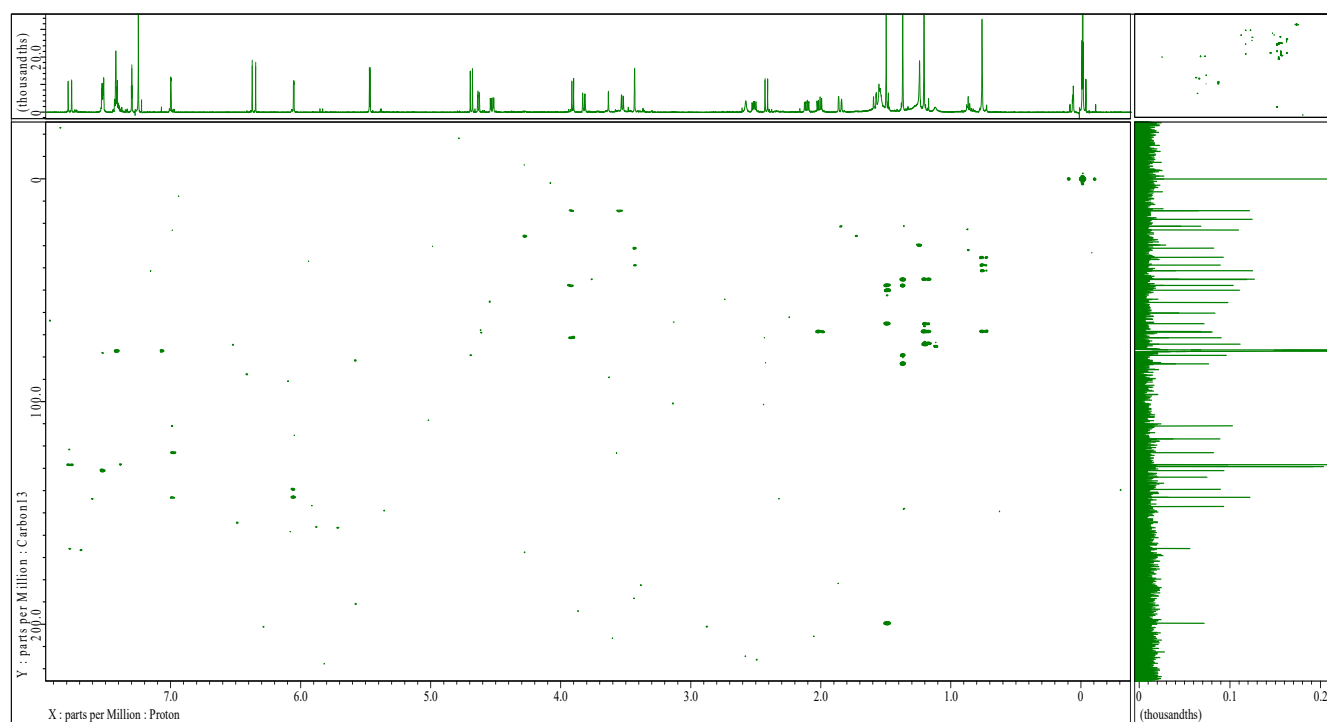

Figure S19. HMBC spectrum of compound **3** in CDCl<sub>3</sub> at 600MHz

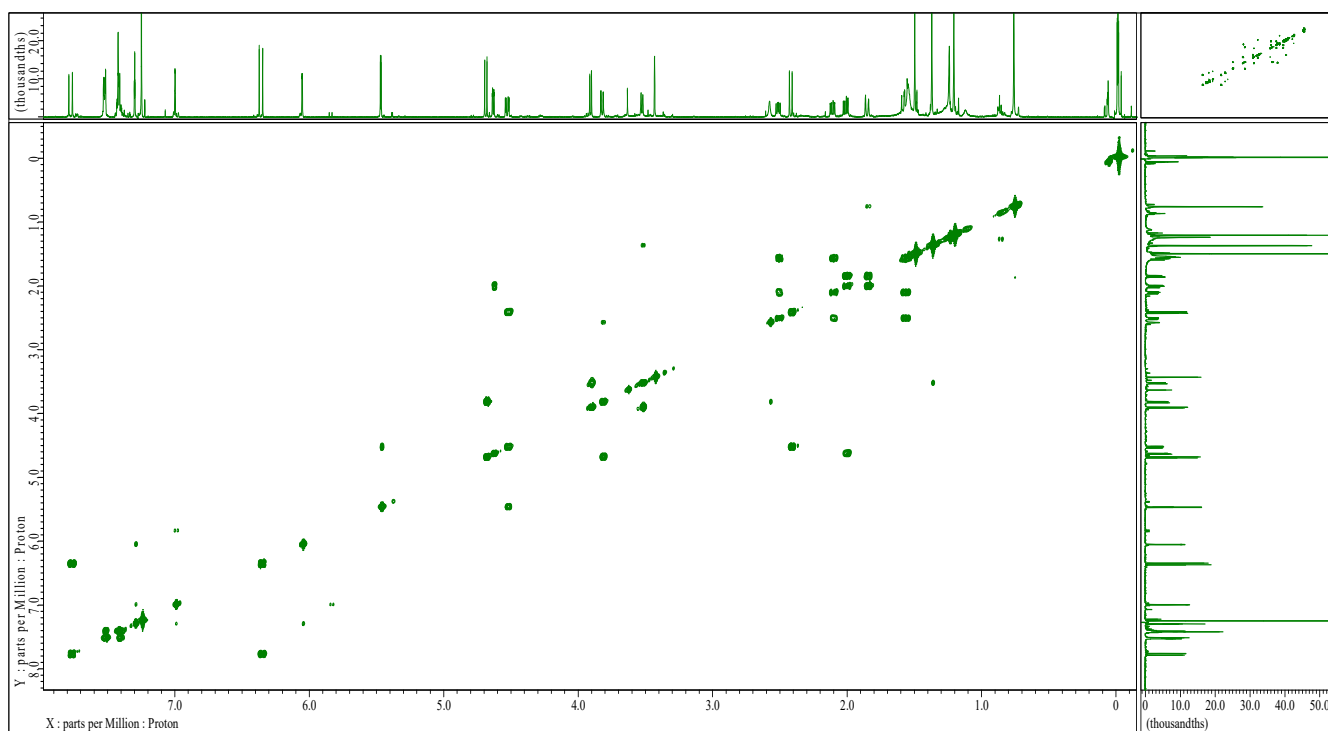

Figure S20. COSY spectrum of compound **3** in CDCl<sub>3</sub> at 600MHz

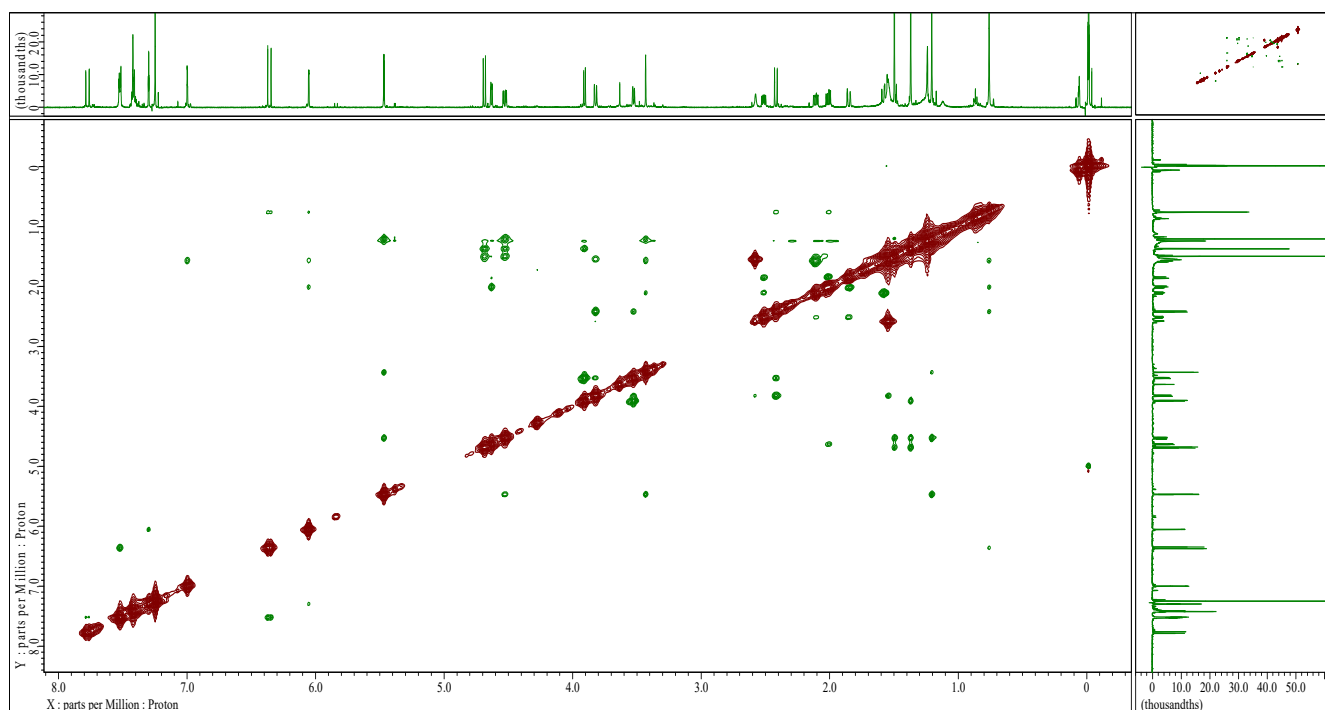

Figure S21. NOESY spectrum of compound **3** in CDCl<sub>3</sub> at 600MHz

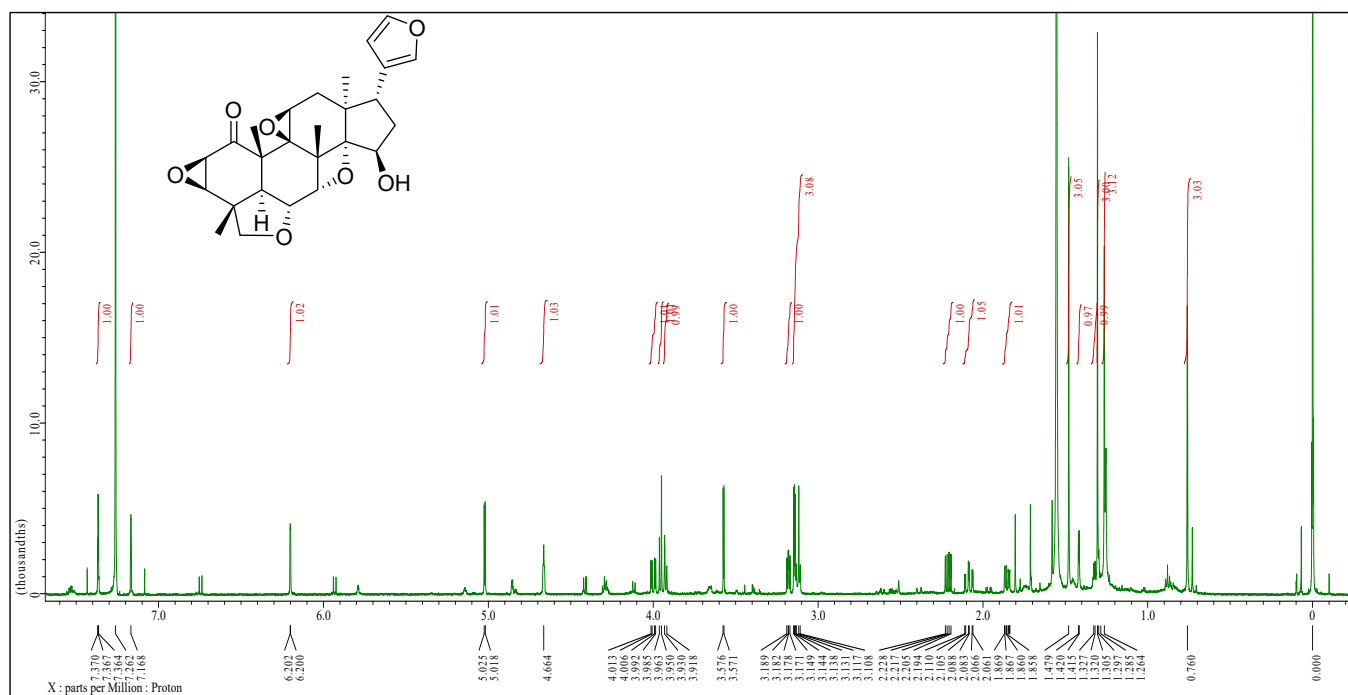

Figure S22. <sup>1</sup>H NMR spectrum of compound 4 in CDCl<sub>3</sub> at 600MHz

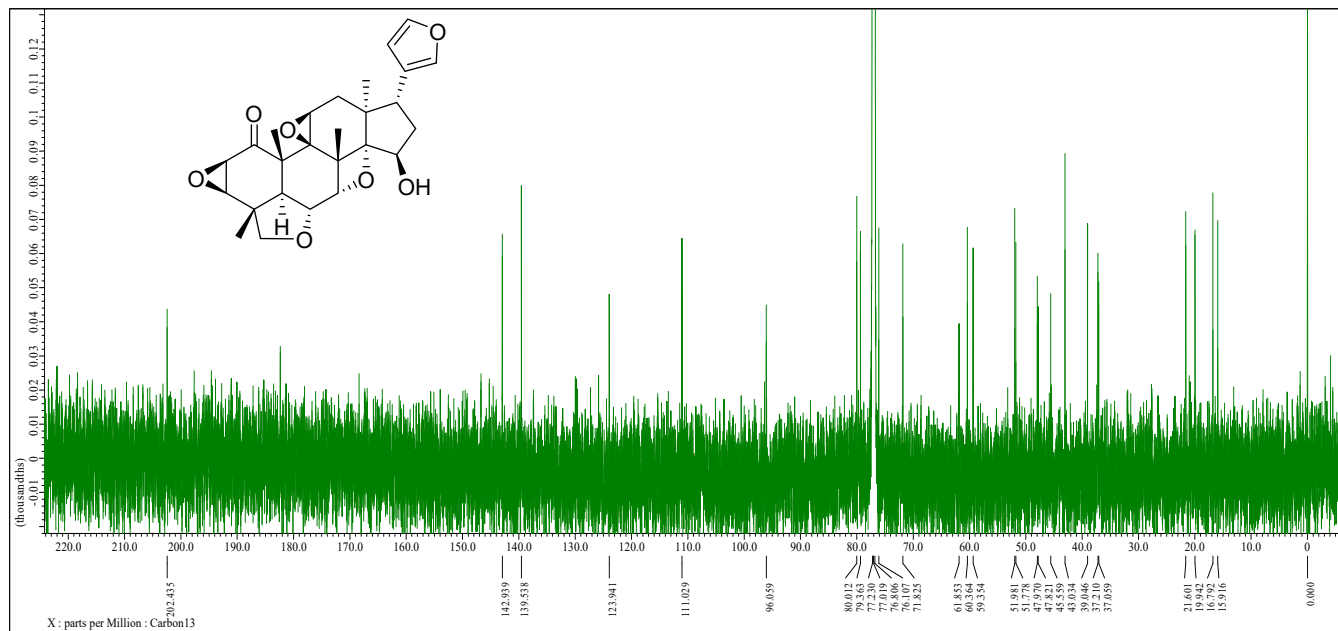

Figure S23. <sup>13</sup>C NMR spectrum of compound 4 in CDCl<sub>3</sub> at 150MHz

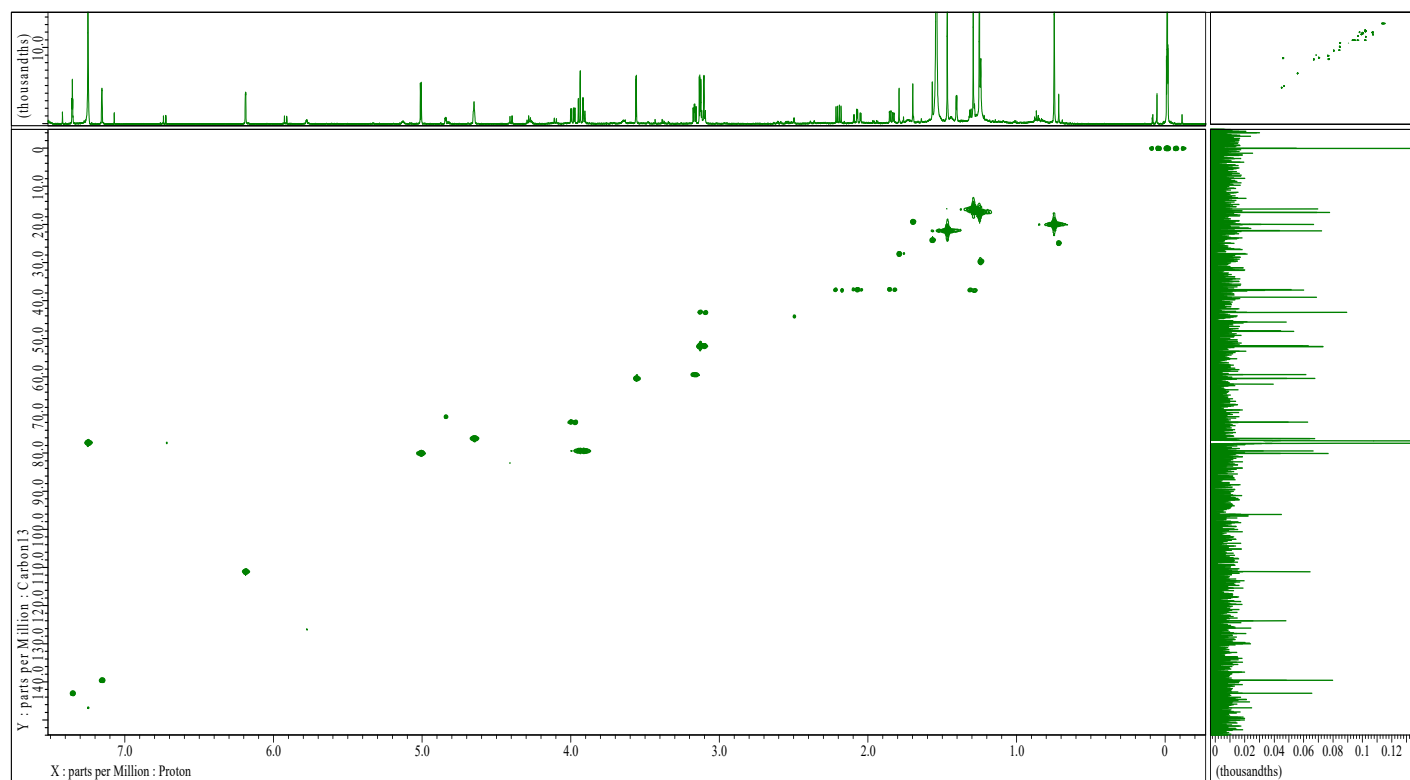

Figure S24. HMQC spectrum of compound **4** in CDCl<sub>3</sub> at 600MHz

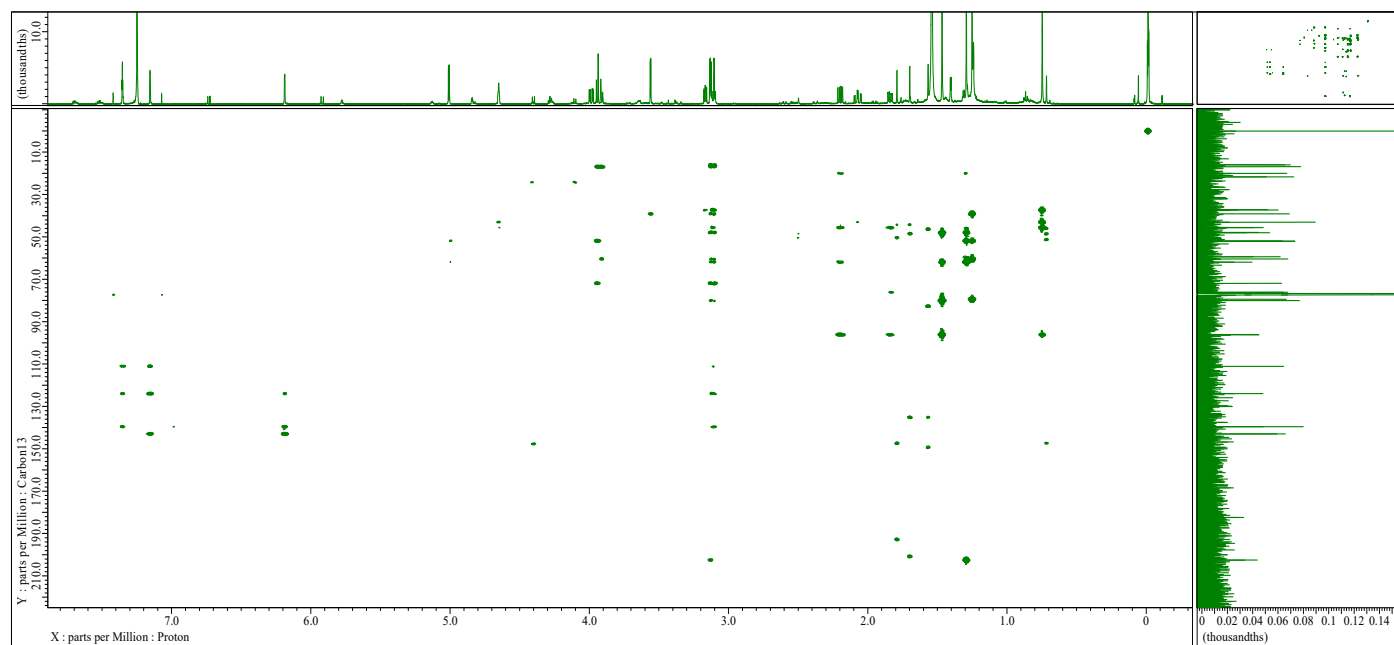

Figure S25. HMBC spectrum of compound **4** in CDCl<sub>3</sub> at 600MHz



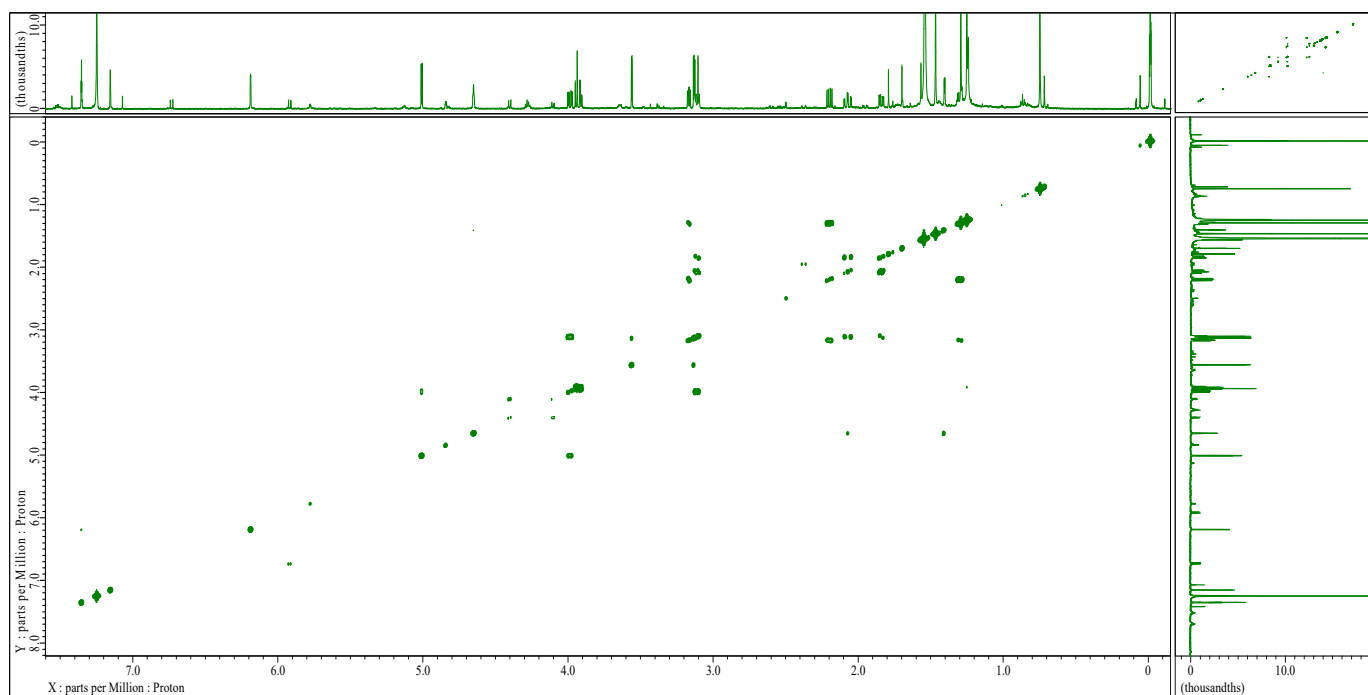

Figure S26. COSY spectrum of compound **4** in  $\text{CDCl}_3$  at 600MHz

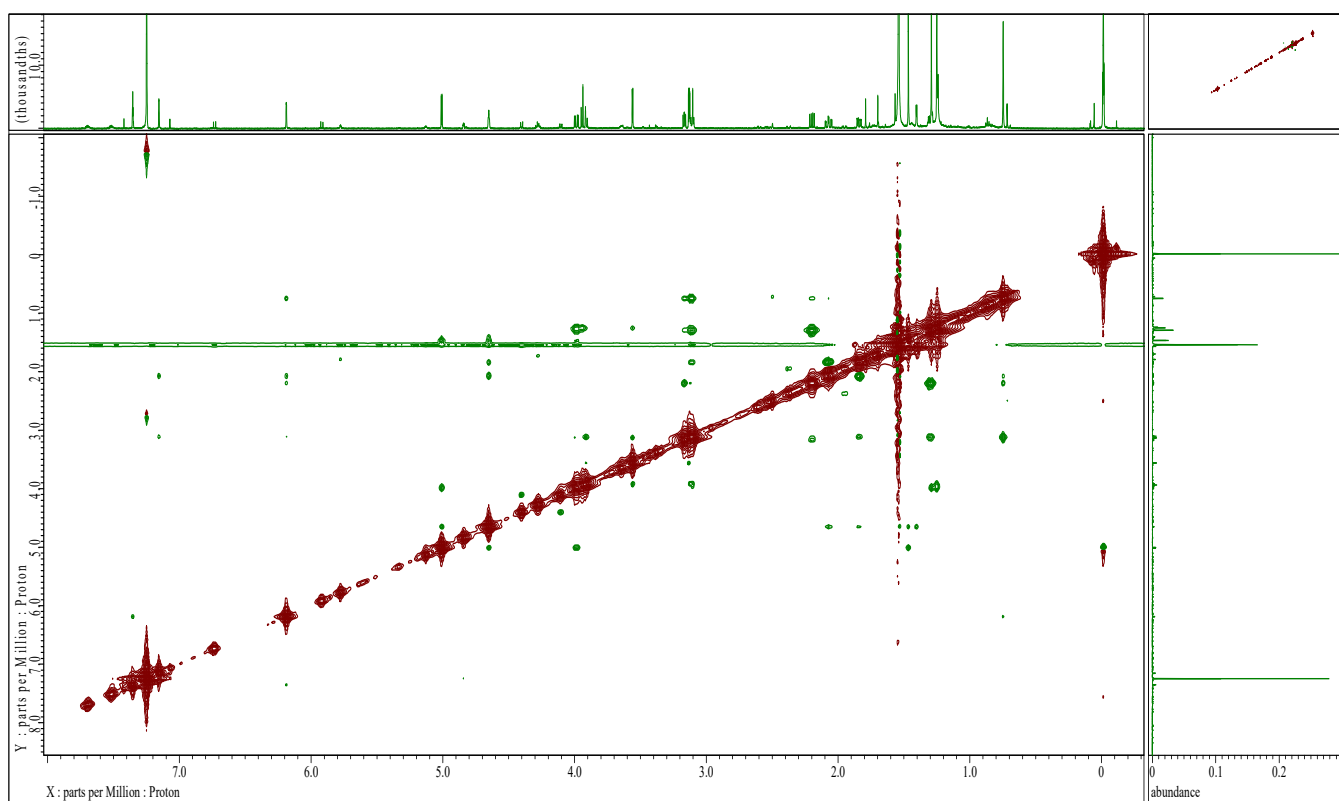

Figure S27. NOESY spectrum of compound **4** in  $\text{CDCl}_3$  at 600MHz

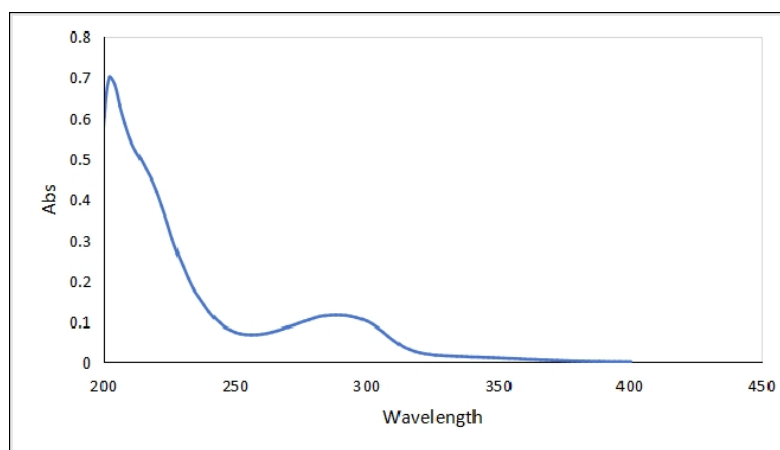

Figure S28. UV spectrum of compound 4 in MeOH

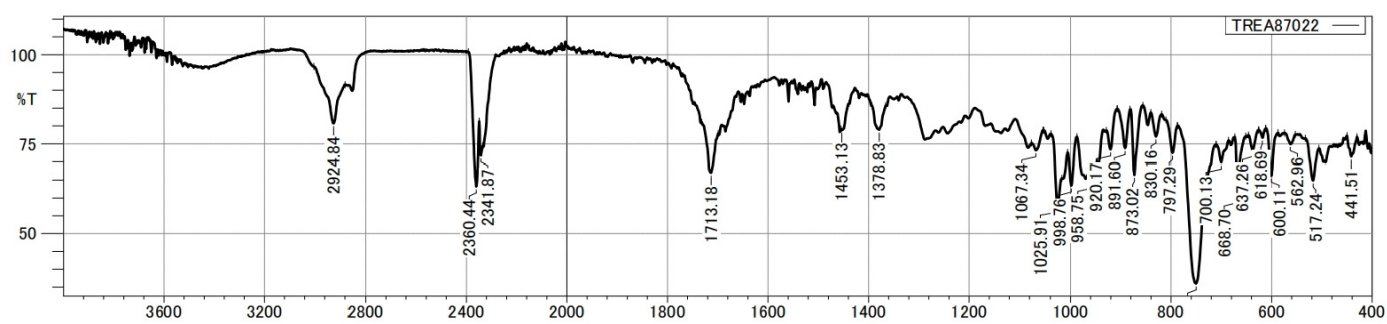

Figure S29. IR spectrum of compound 4

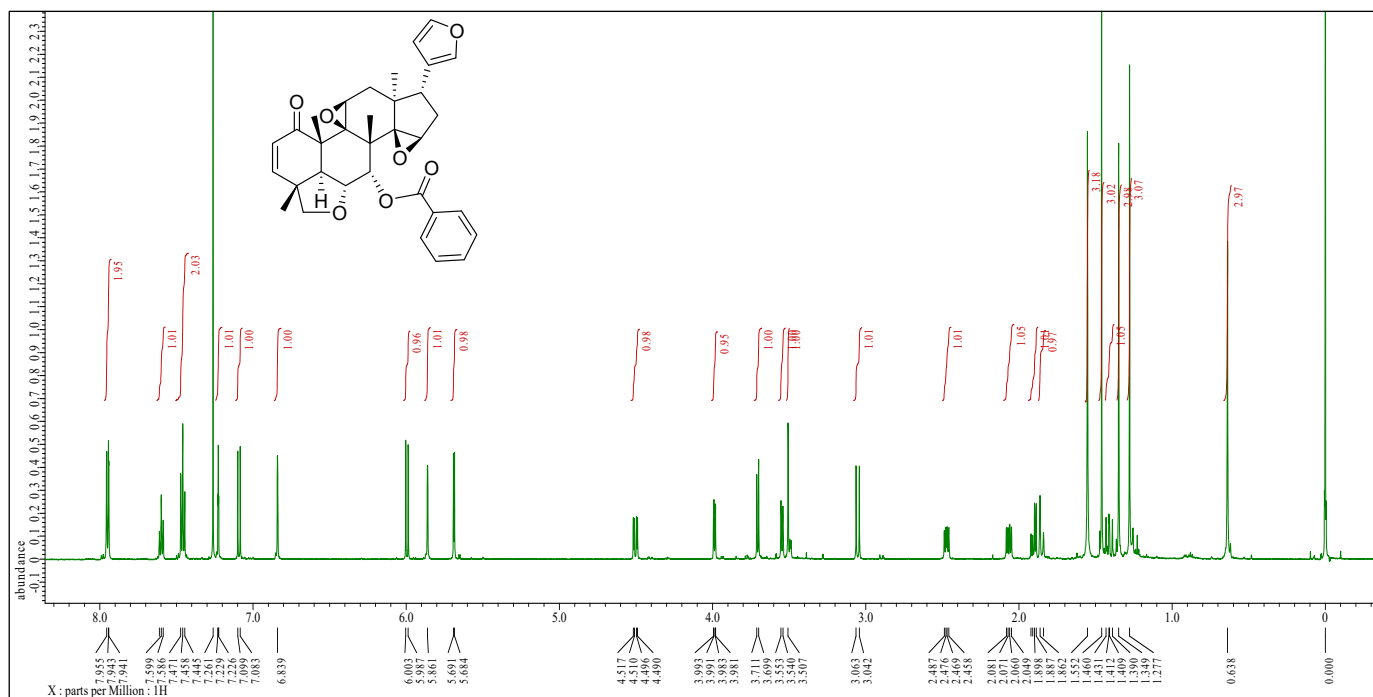

Figure S30. <sup>1</sup>H NMR spectrum of compound **5** in CDCl<sub>3</sub> at 600MHz

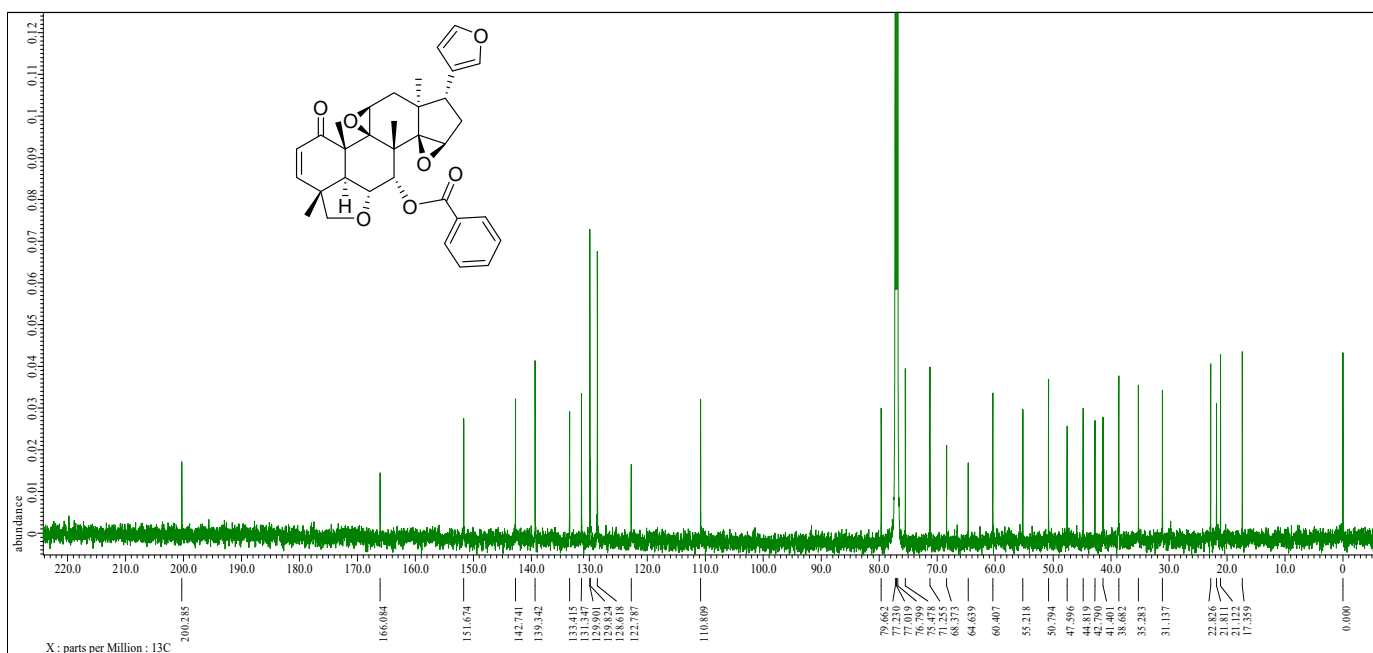

Figure S31. <sup>13</sup>C NMR spectrum of compound **5** in CDCl<sub>3</sub> at 150MHz

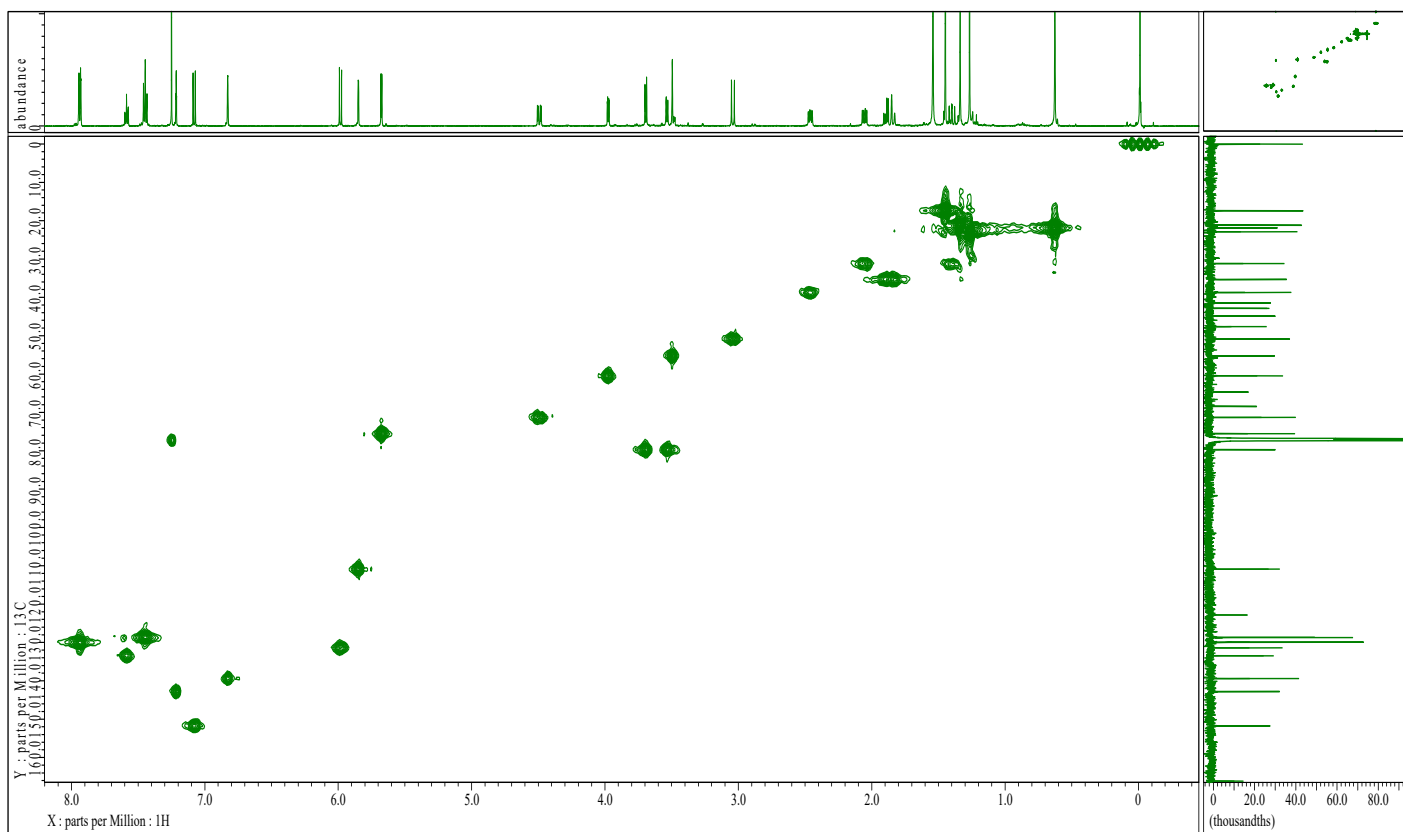

Figure S32. HMQC spectrum of compound **5** in CDCl<sub>3</sub> at 600MHz

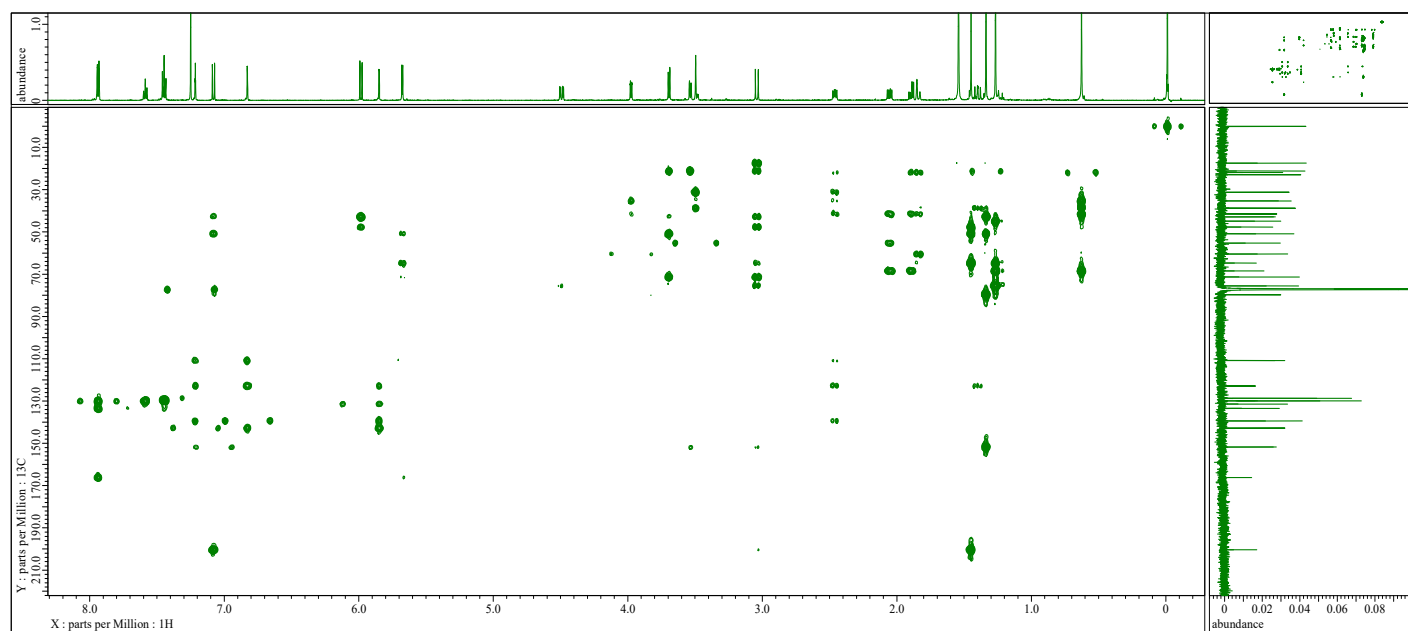

Figure S33. HMBC spectrum of compound **5** in CDCl<sub>3</sub> at 600MHz

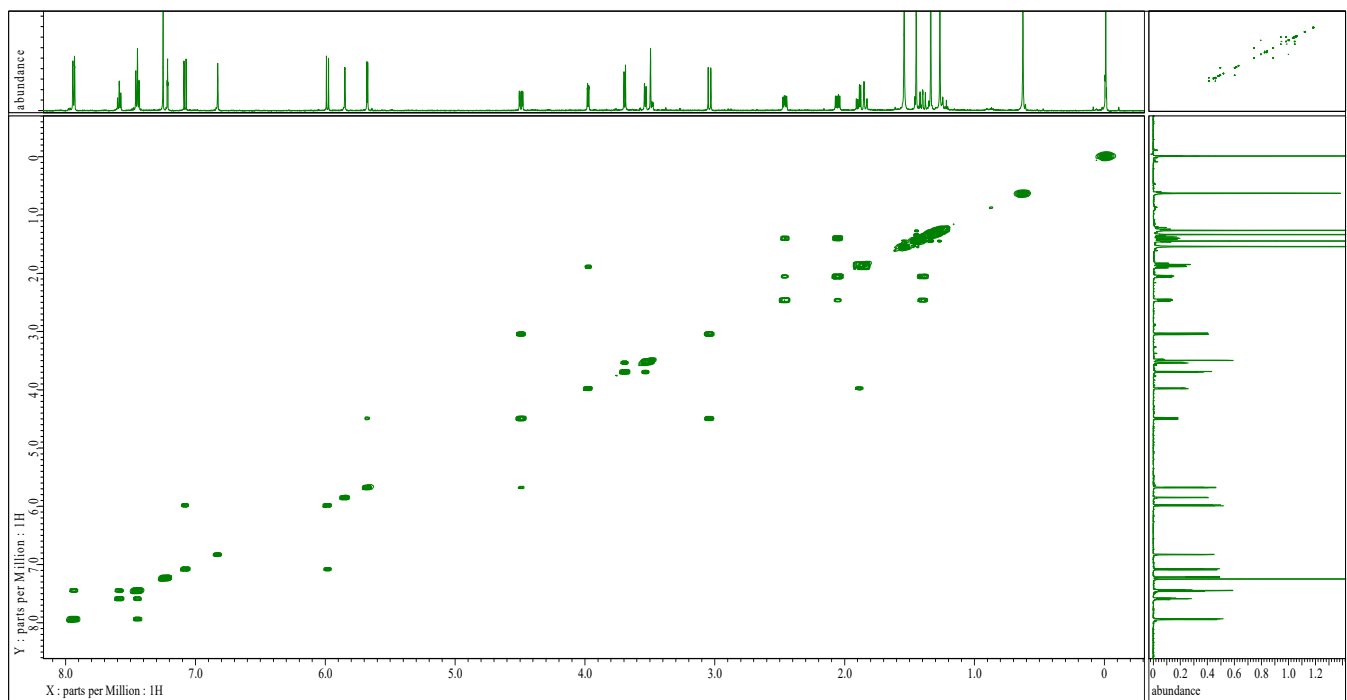

Figure S34. COSY spectrum of compound **5** in  $\text{CDCl}_3$  at 600MHz

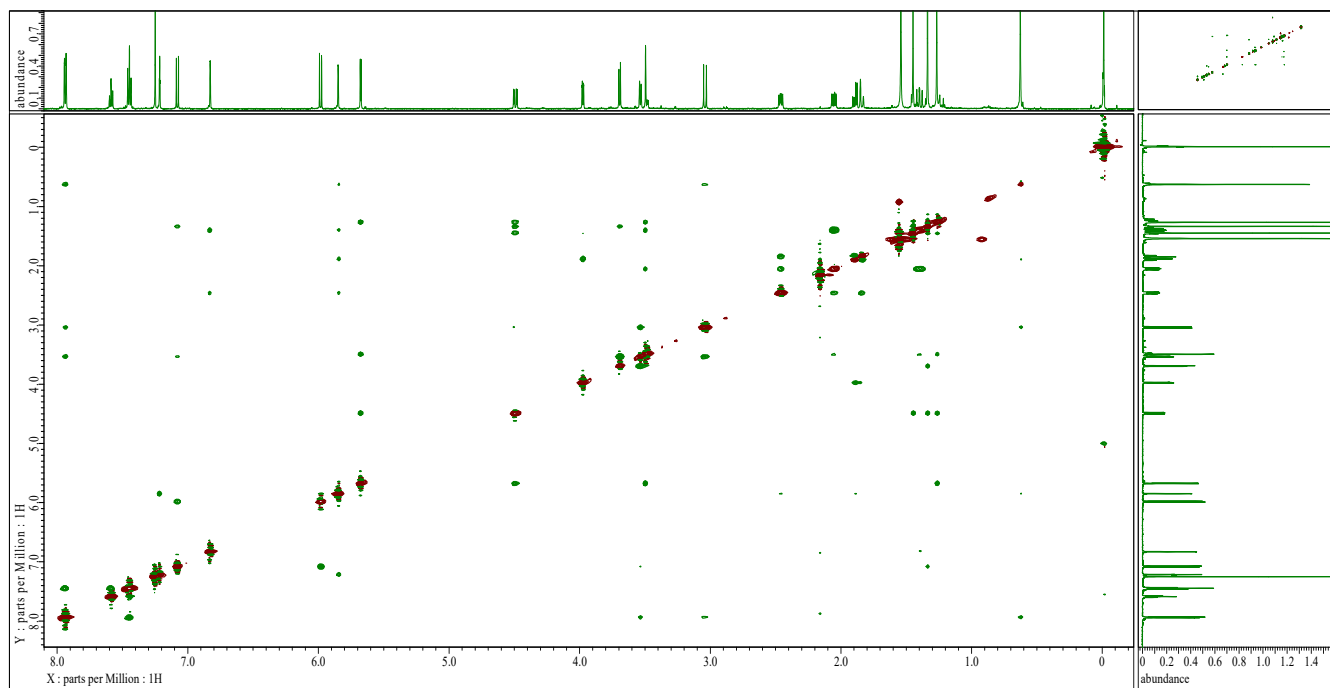

Figure S35. NOESY spectrum of compound **5** in  $\text{CDCl}_3$  at 600MHz

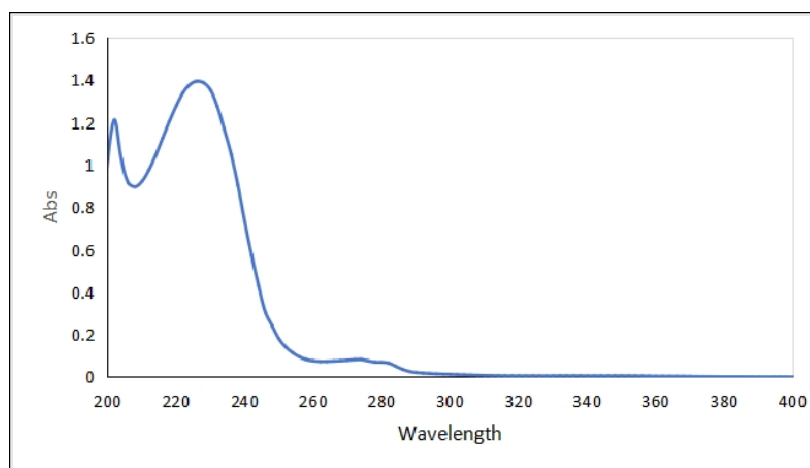

Figure S36. UV spectrum of compound **5** in MeOH

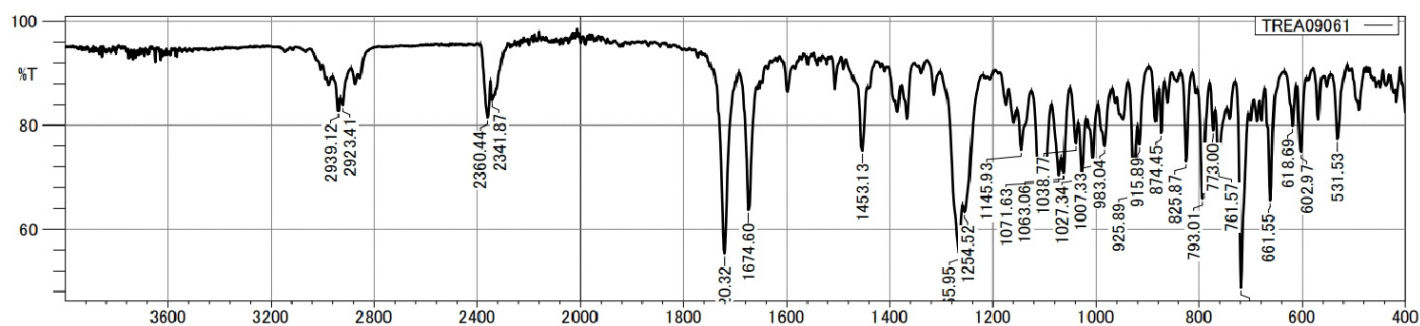

Figure S37. IR spectrum of compound **5**

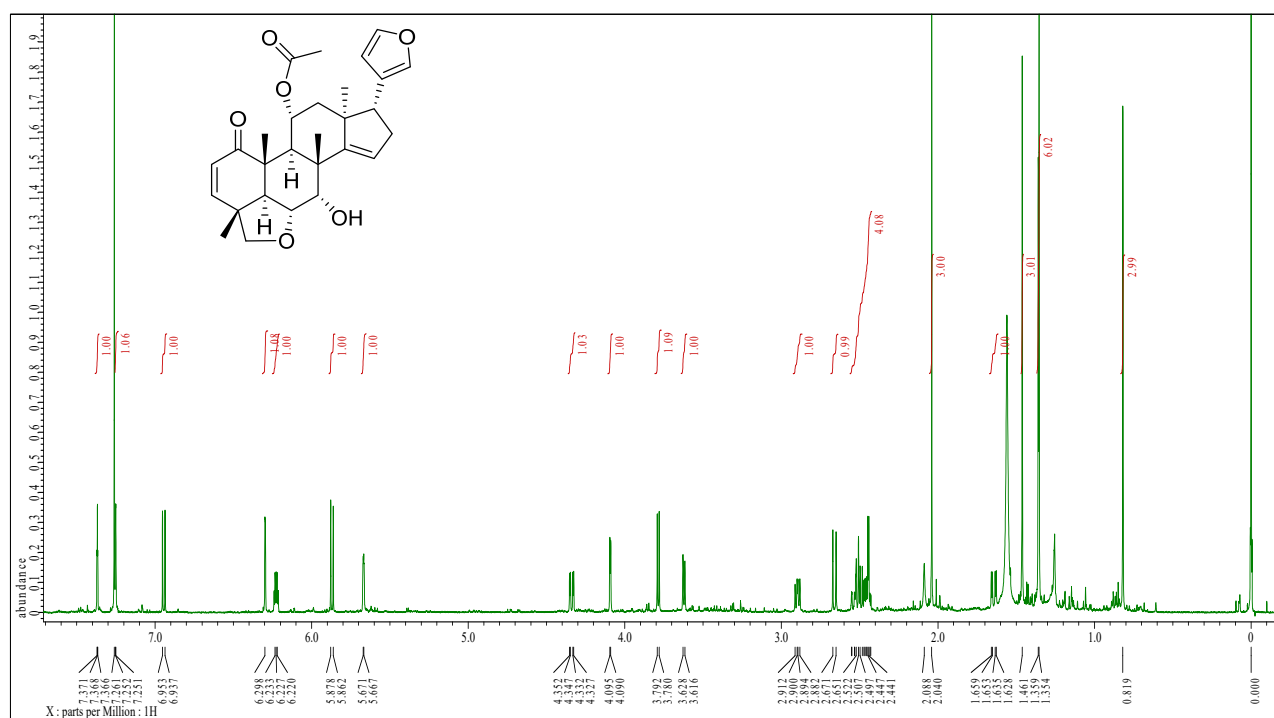

Figure S38. <sup>1</sup>H NMR spectrum of compound 6 in CDCl<sub>3</sub> at 600MHz

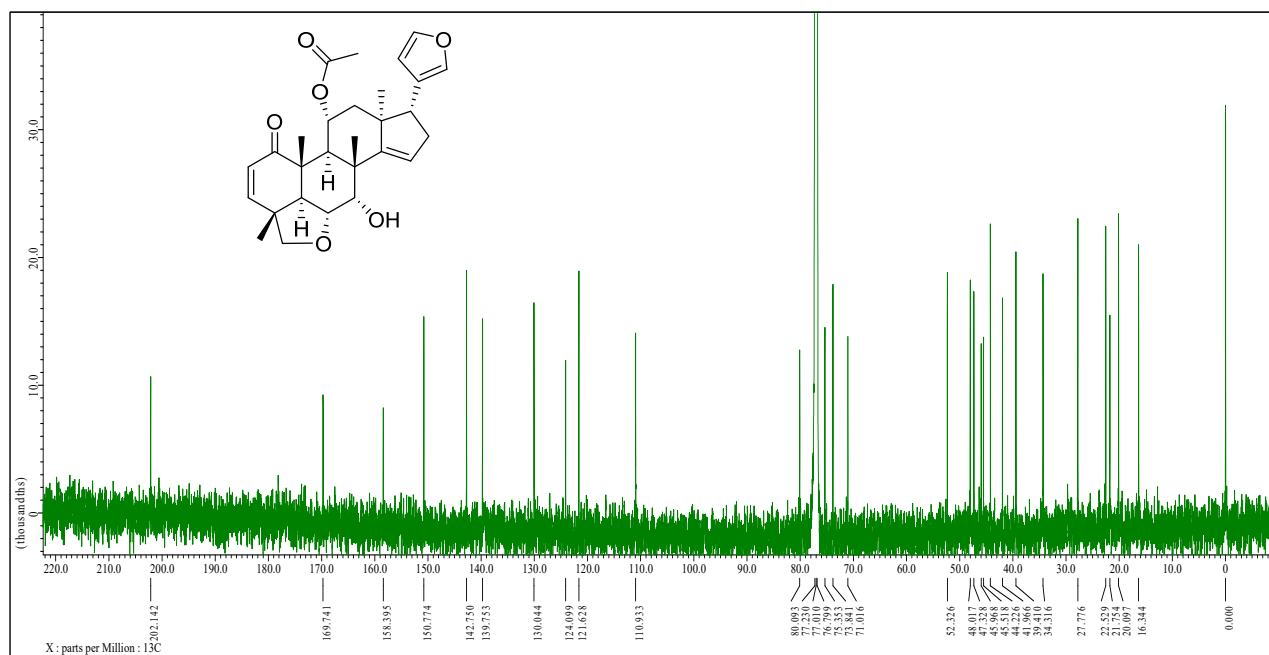

Figure S39. <sup>13</sup>C NMR spectrum of compound 6 in CDCl<sub>3</sub> at 150MHz

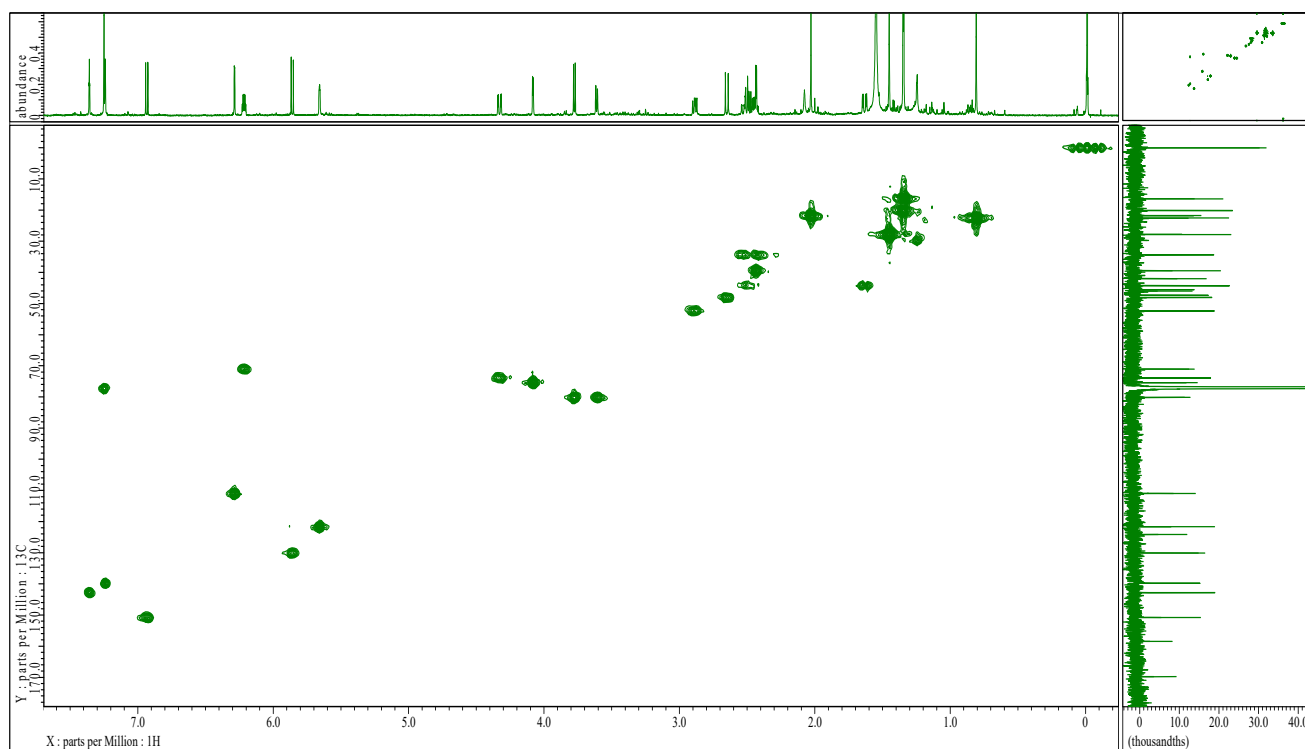

Figure S40. HMQC spectrum of compound **6** in  $\text{CDCl}_3$  at 600MHz

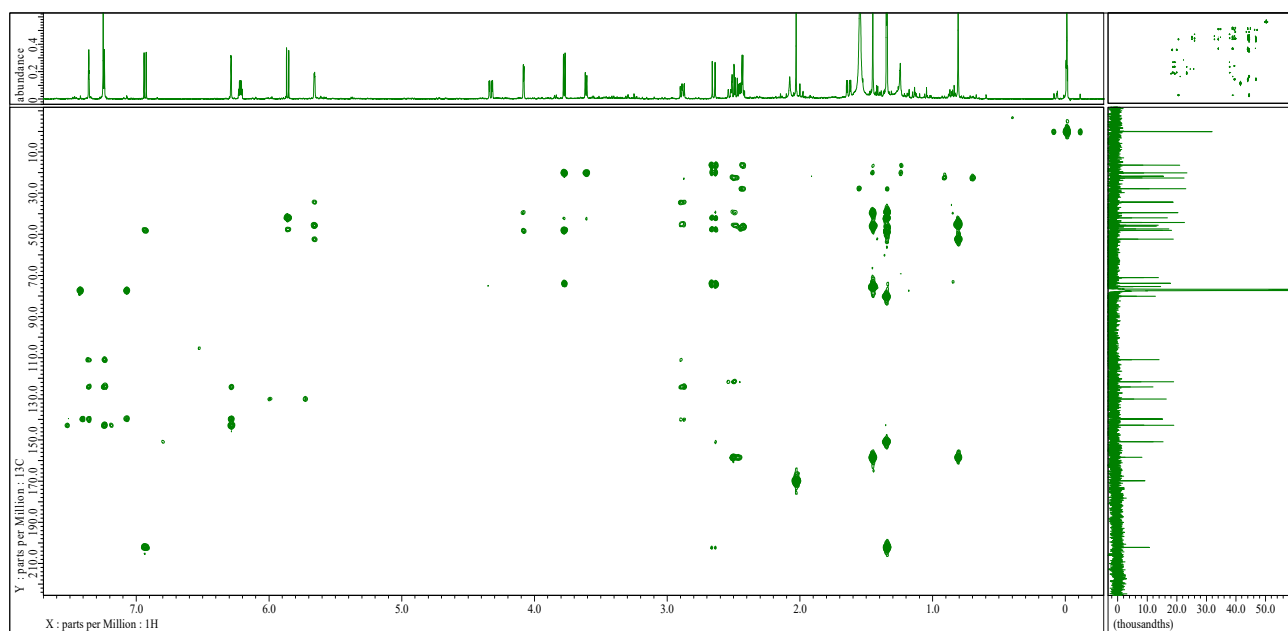

Figure S41. HMBC spectrum of compound **6** in  $\text{CDCl}_3$  at 600MHz



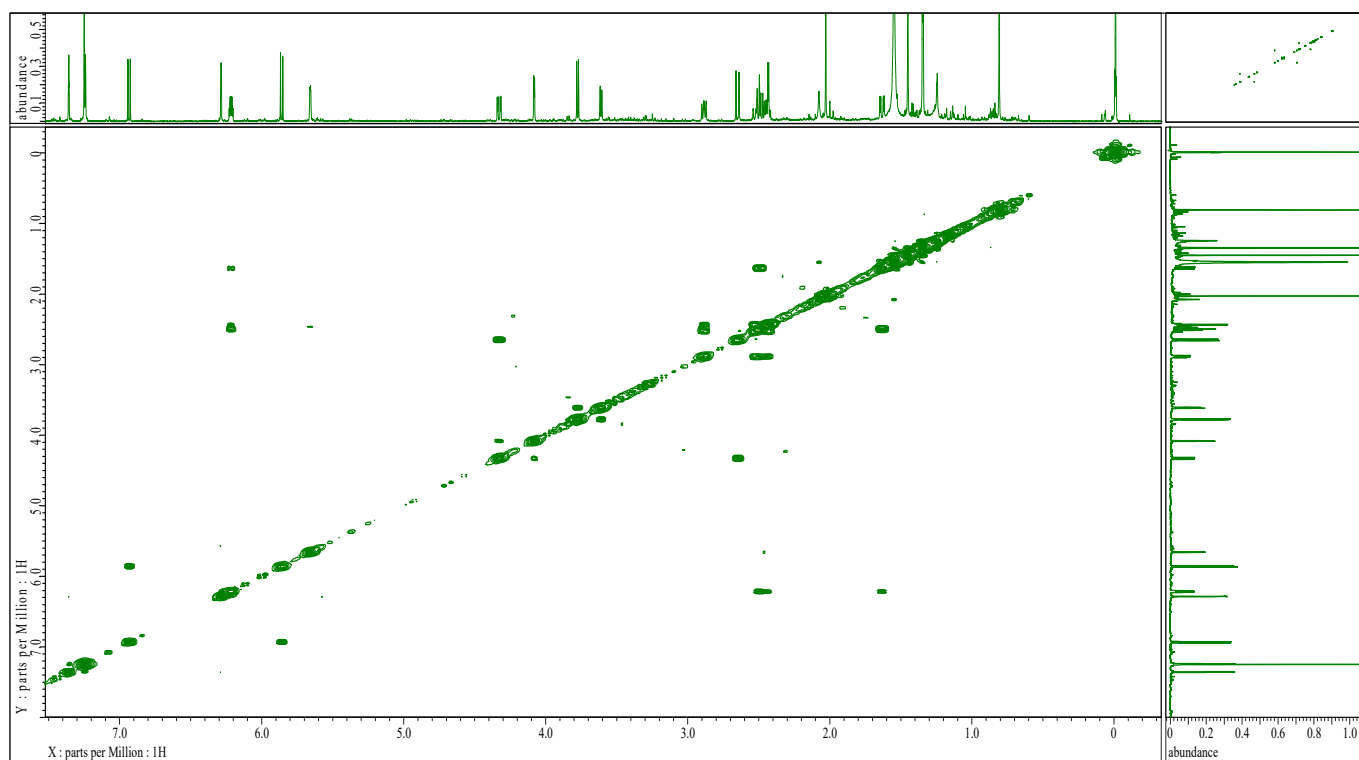

Figure S42. COSY spectrum of compound **6** in CDCl<sub>3</sub> at 600MHz

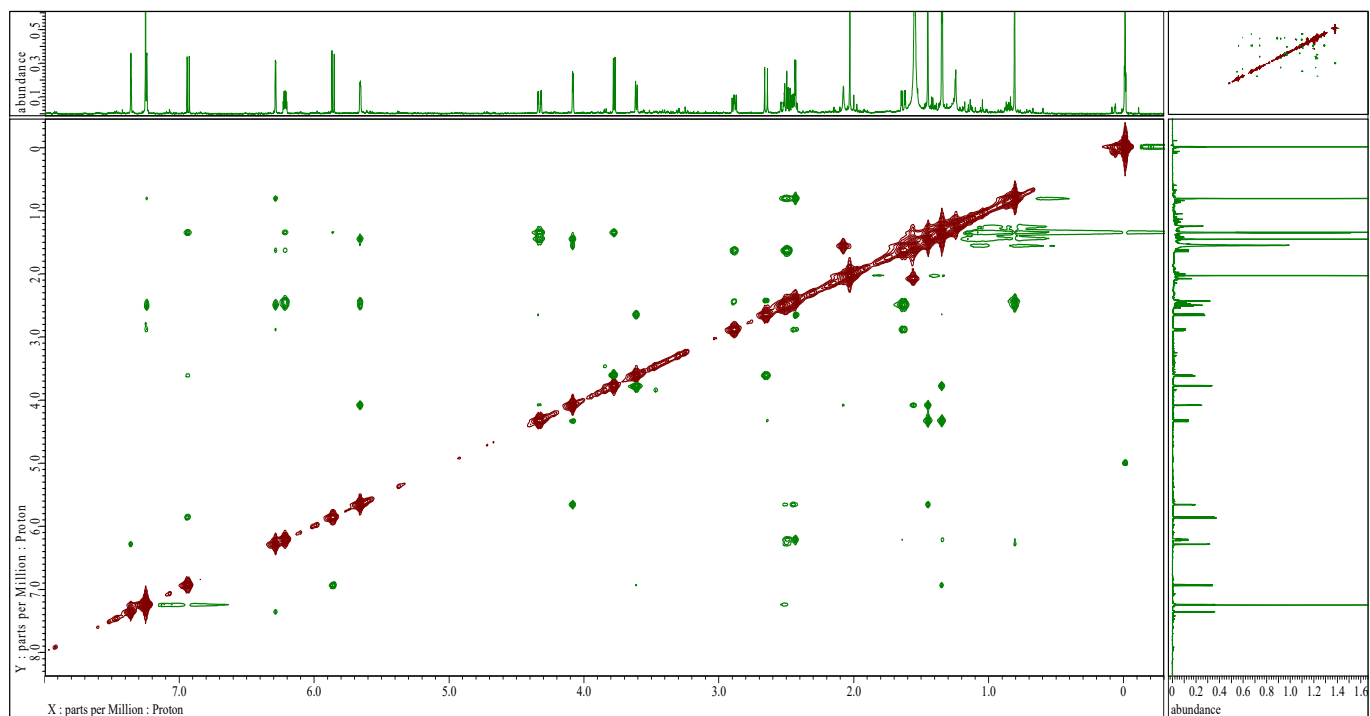

Figure S43. NOESY spectrum of compound **6** in CDCl<sub>3</sub> at 600MHz

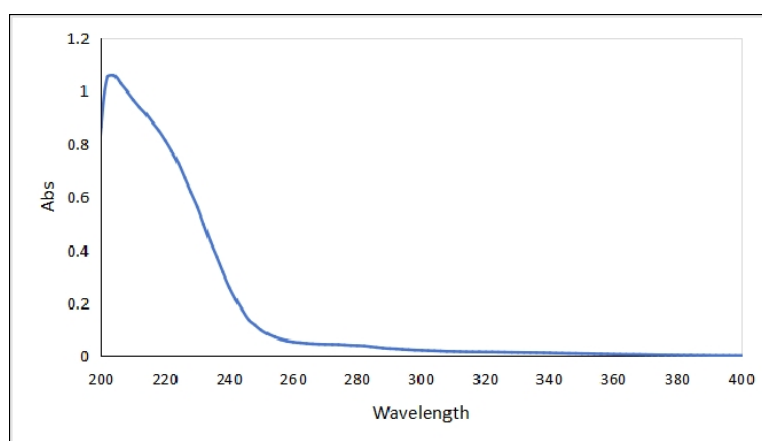

Figure S44. UV spectrum of compound **6** in MeOH

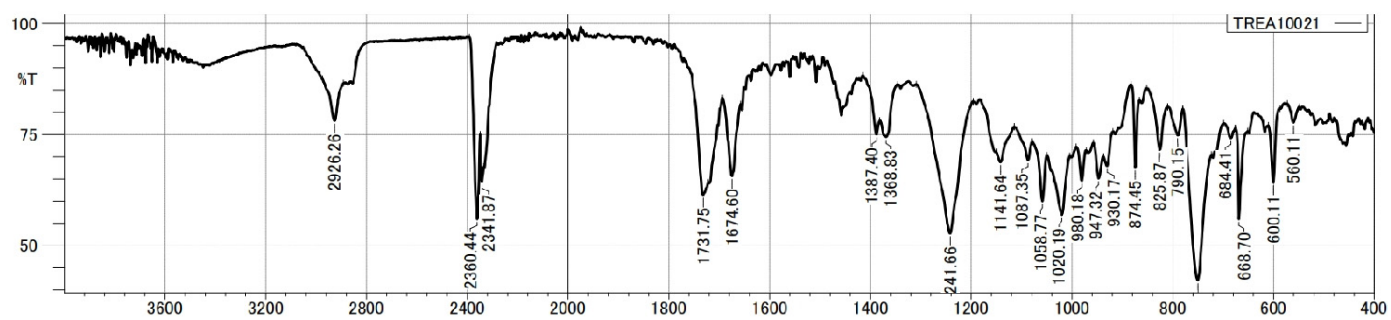

Figure S45. IR spectrum of compound **6**

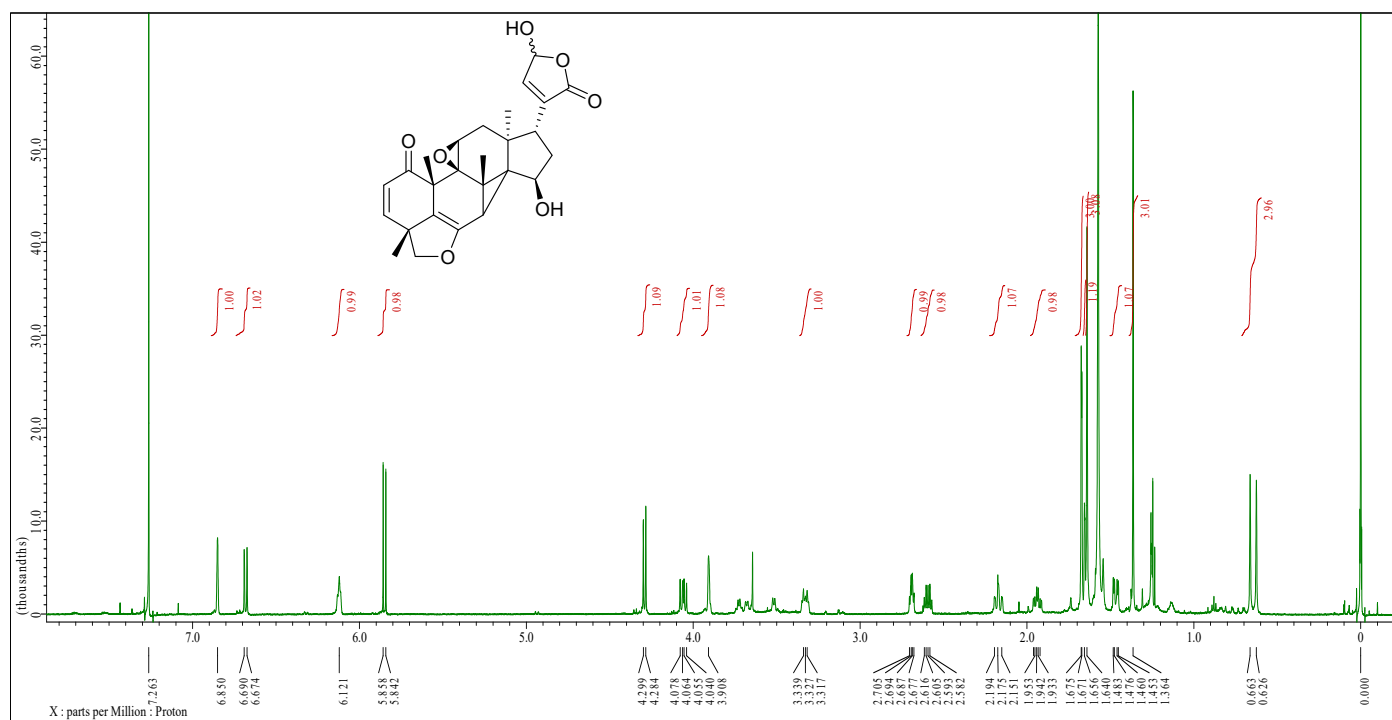

Figure S46. <sup>1</sup>H NMR spectrum of compound 7 in CDCl<sub>3</sub> at 600MHz

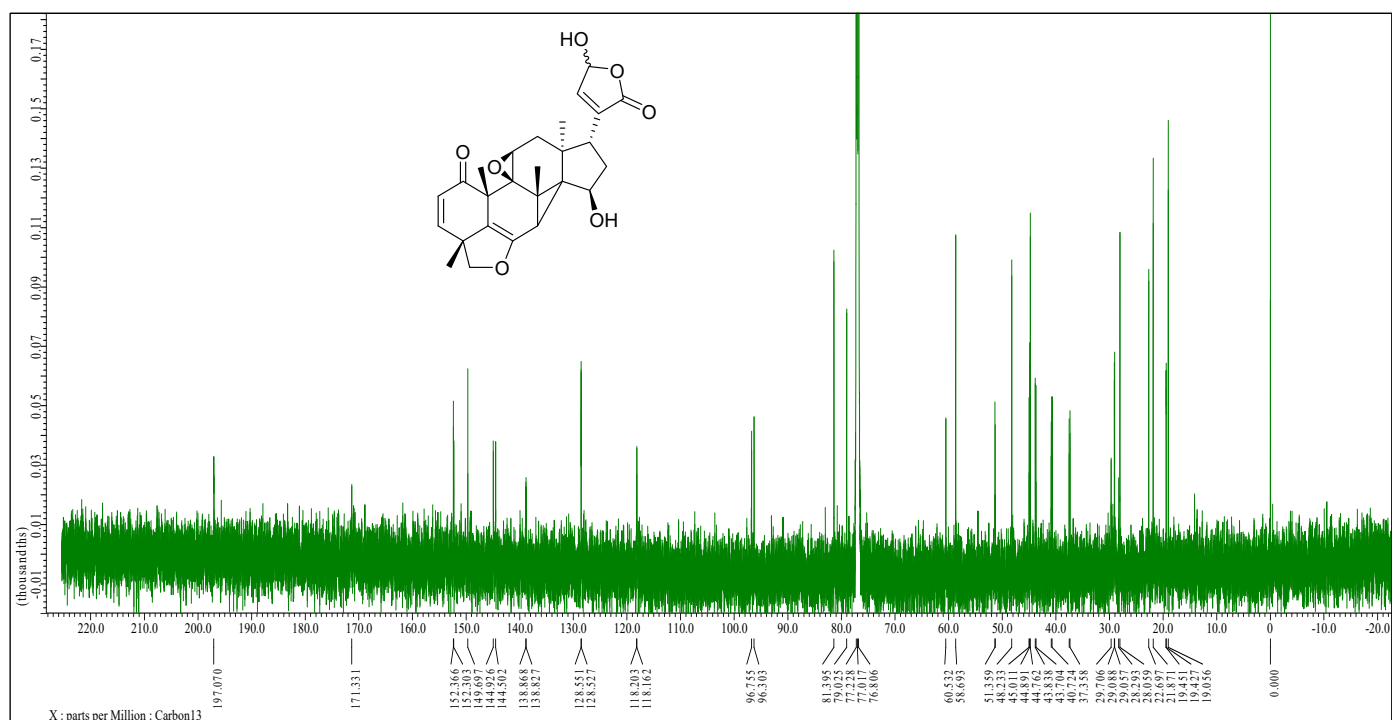

Figure S47. <sup>13</sup>C NMR spectrum of compound 7 in CDCl<sub>3</sub> at 150MHz

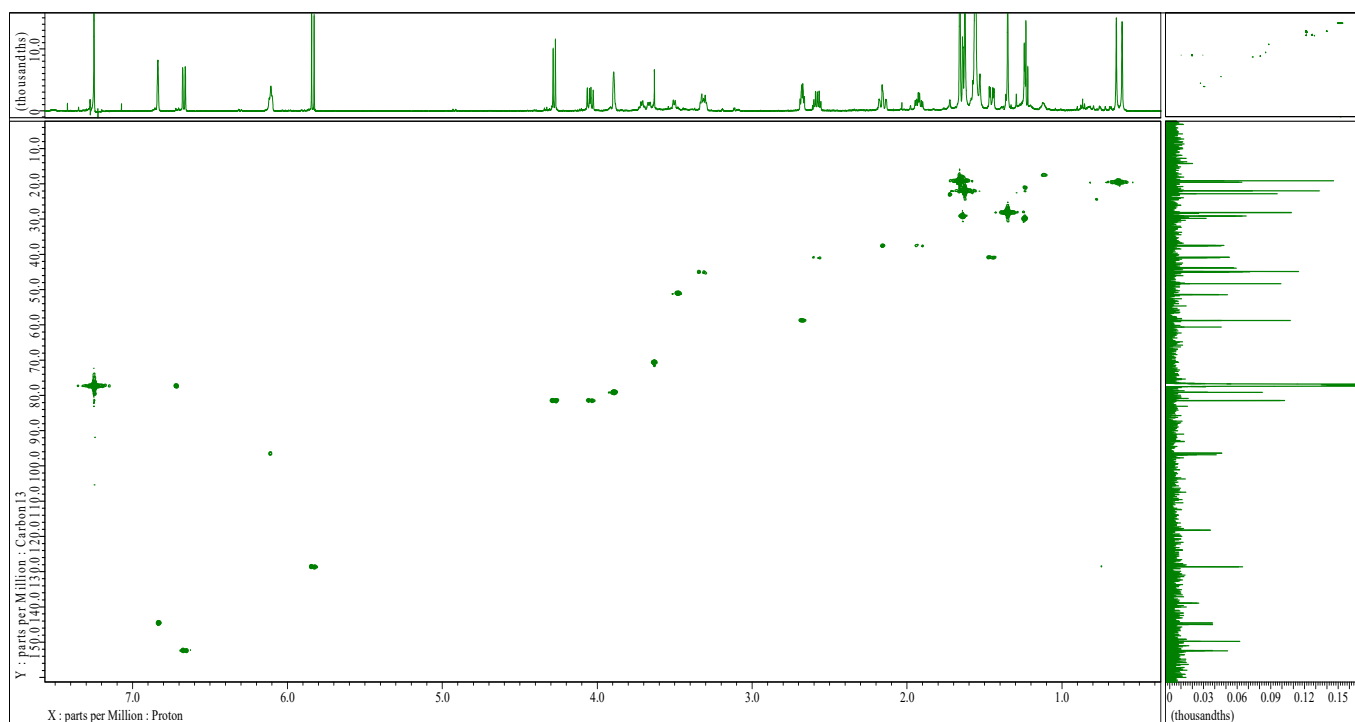

Figure S48. HMBC spectrum of compound **7** in CDCl<sub>3</sub> at 600MHz

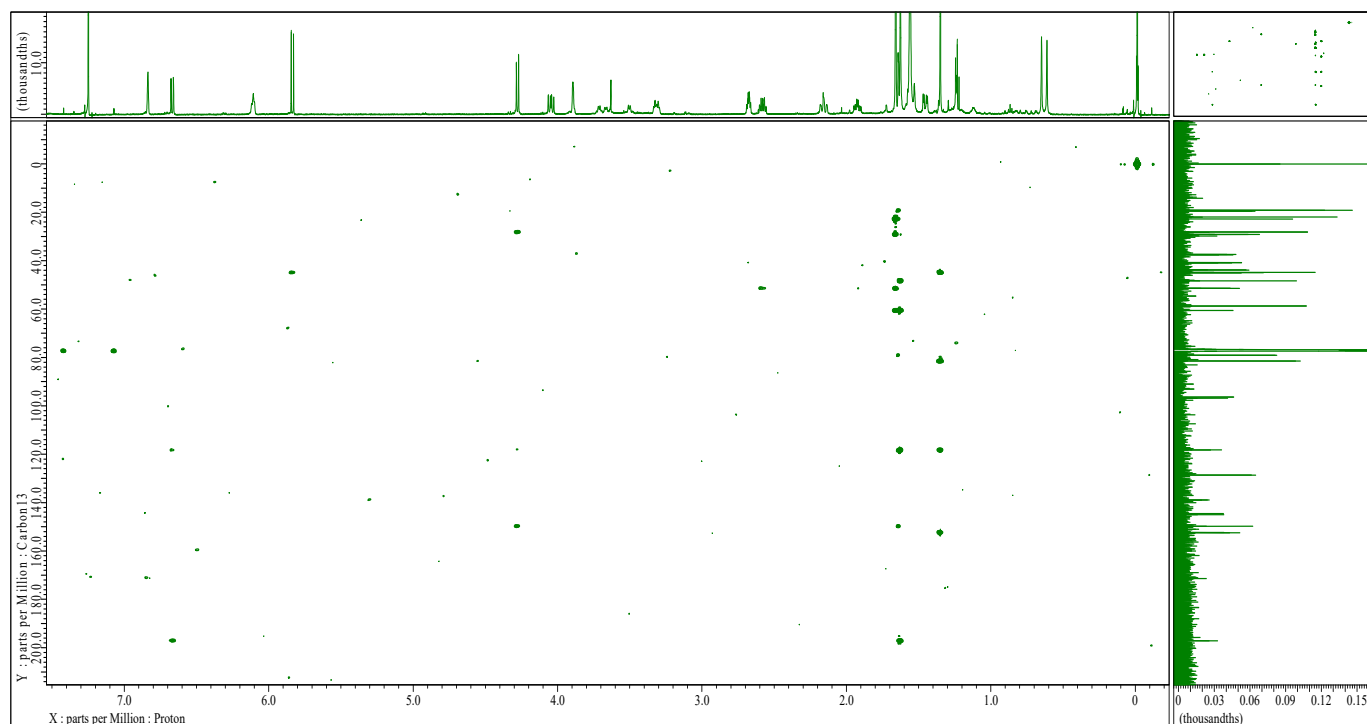

Figure S49. HMBC spectrum of compound **7** in CDCl<sub>3</sub> at 600MHz

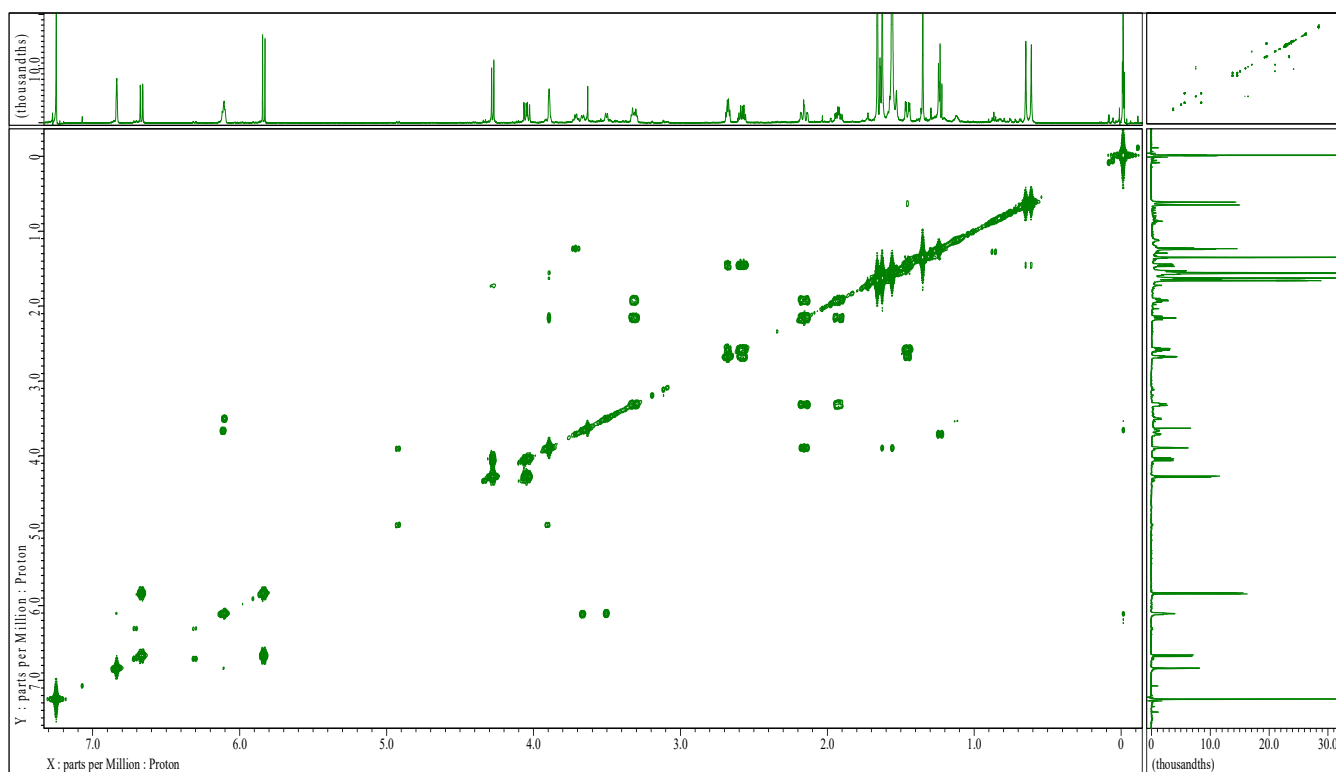

Figure S50. COSY spectrum of compound **7** in  $\text{CDCl}_3$  at 600MHz

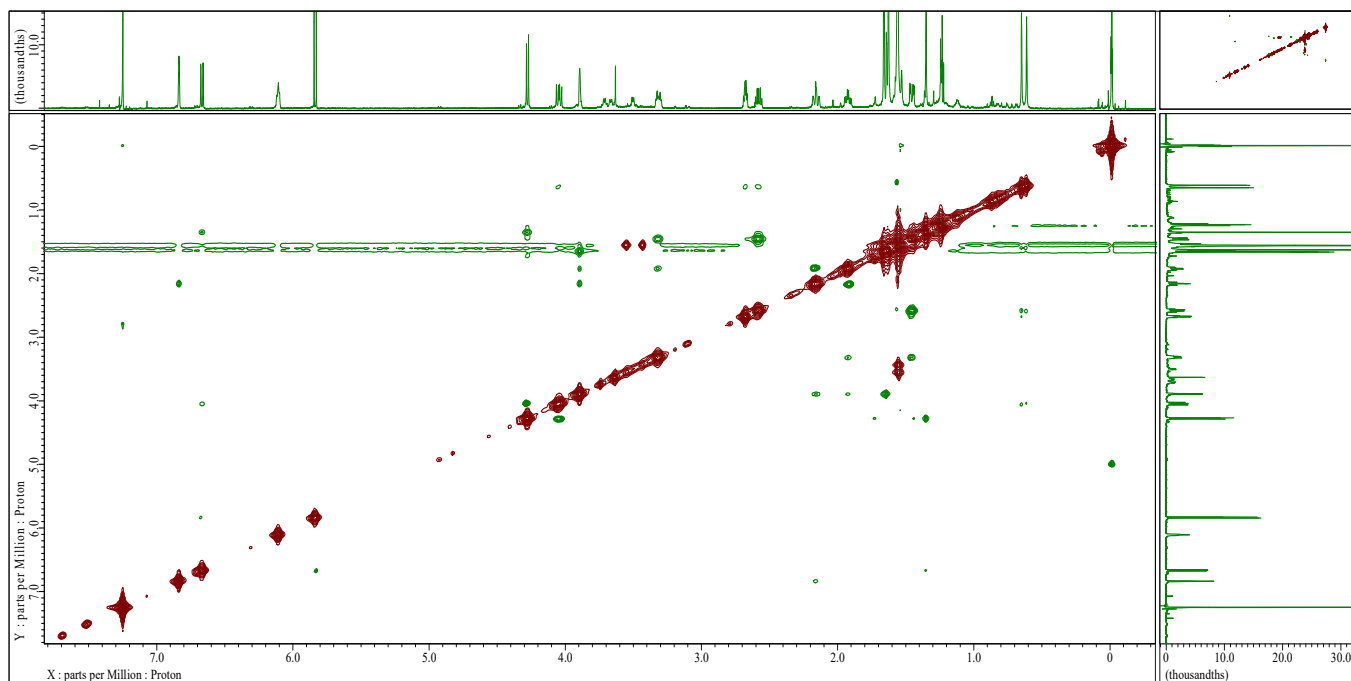

Figure S51. NOESY spectrum of compound **7** in  $\text{CDCl}_3$  at 600MHz

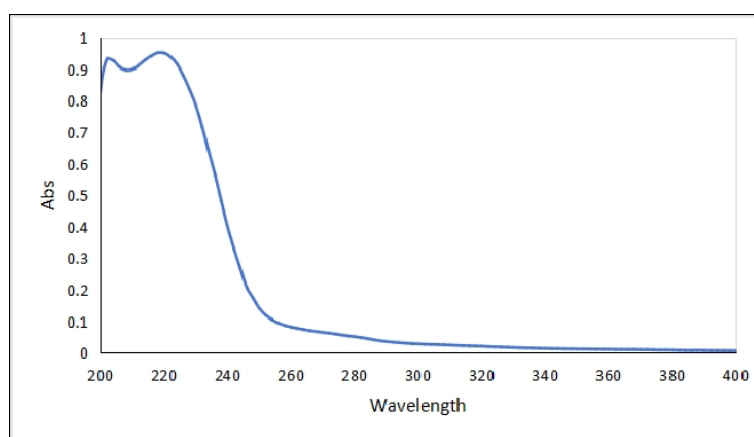

Figure S52. UV spectrum of compound **7** in MeOH

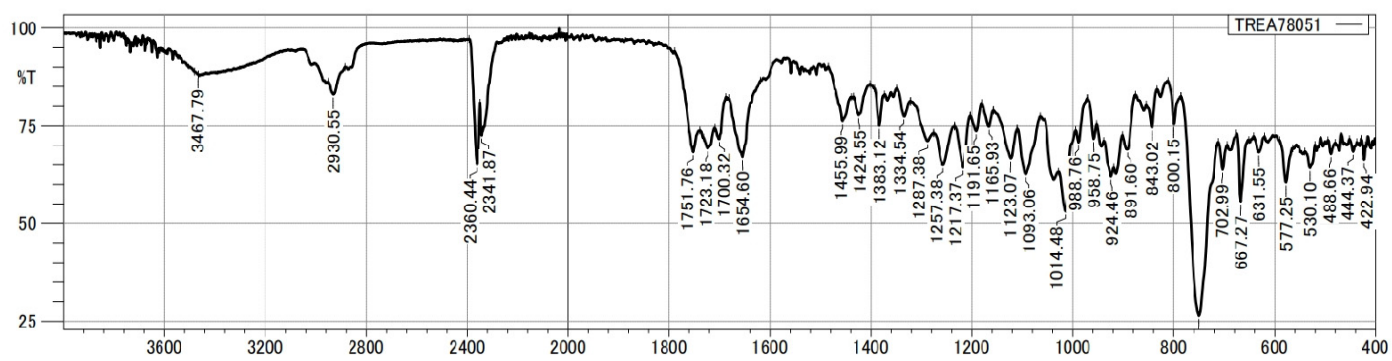

Figure S53. IR spectrum of compound **7**

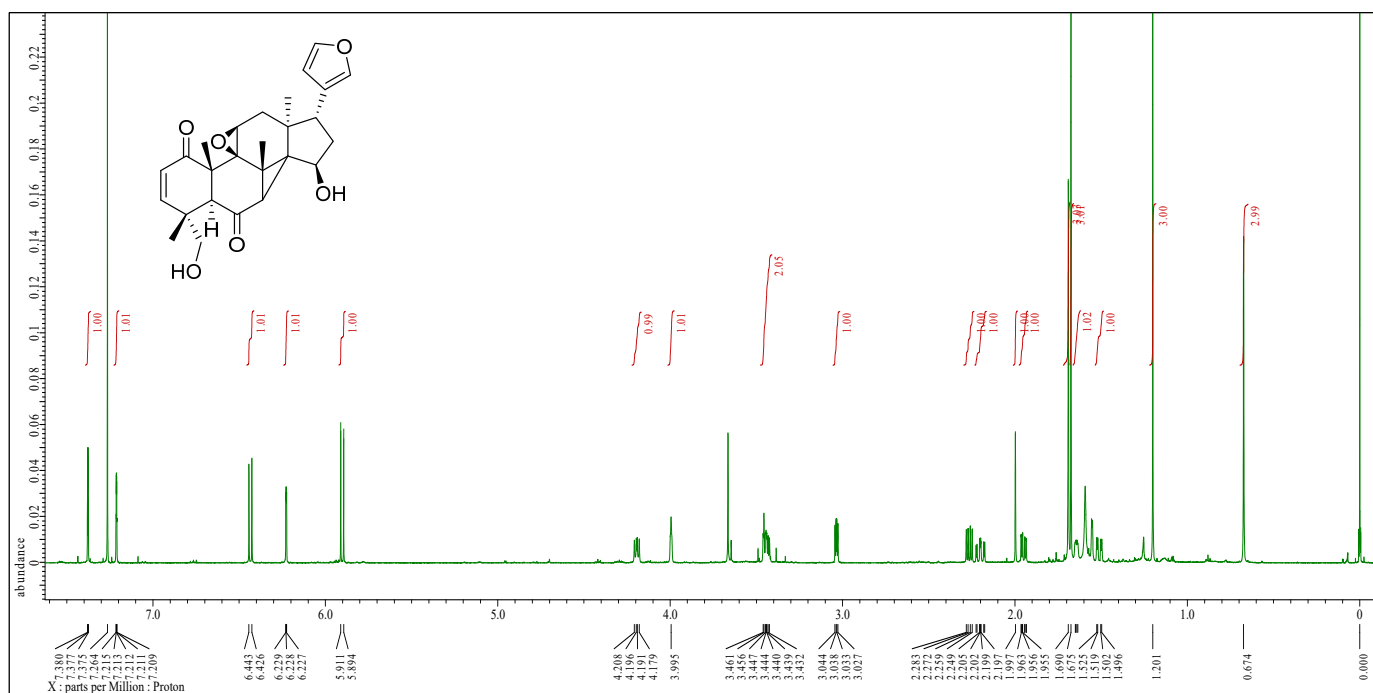

Figure S54. <sup>1</sup>H NMR spectrum of compound **8** in CDCl<sub>3</sub> at 600MHz

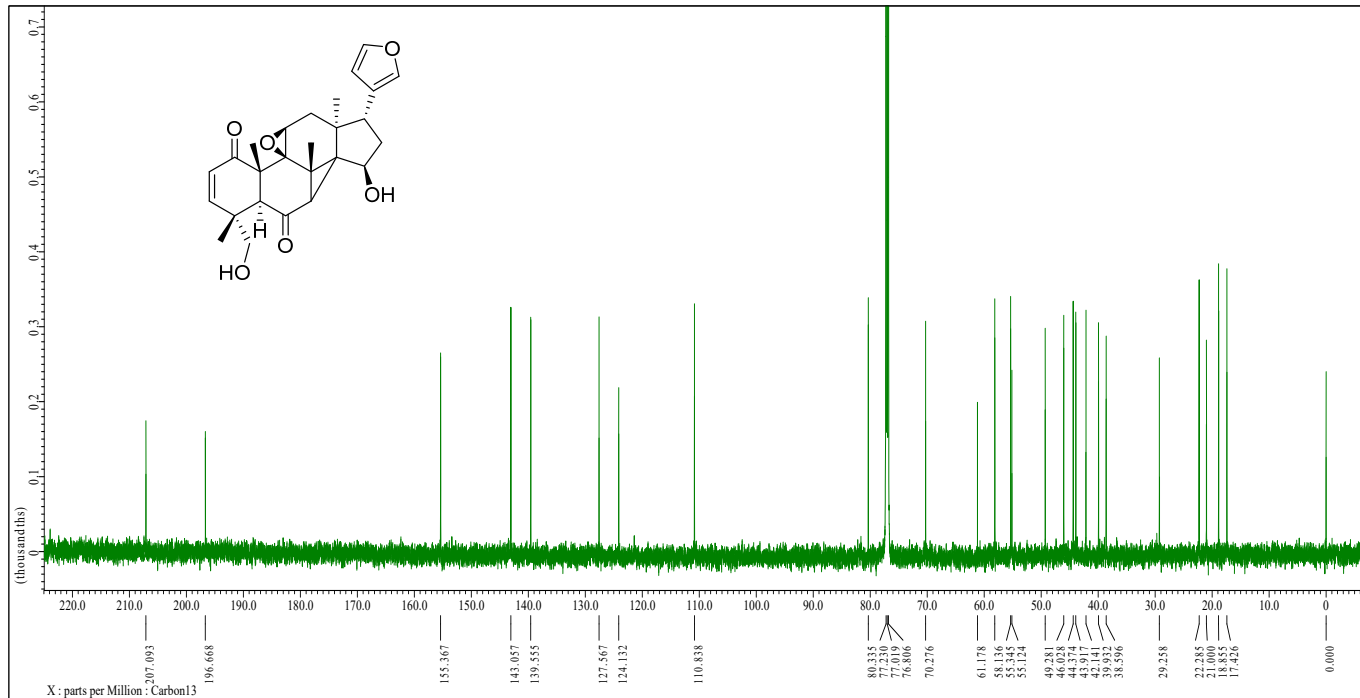

Figure S55. <sup>13</sup>C NMR spectrum of compound **8** in CDCl<sub>3</sub> at 150MHz

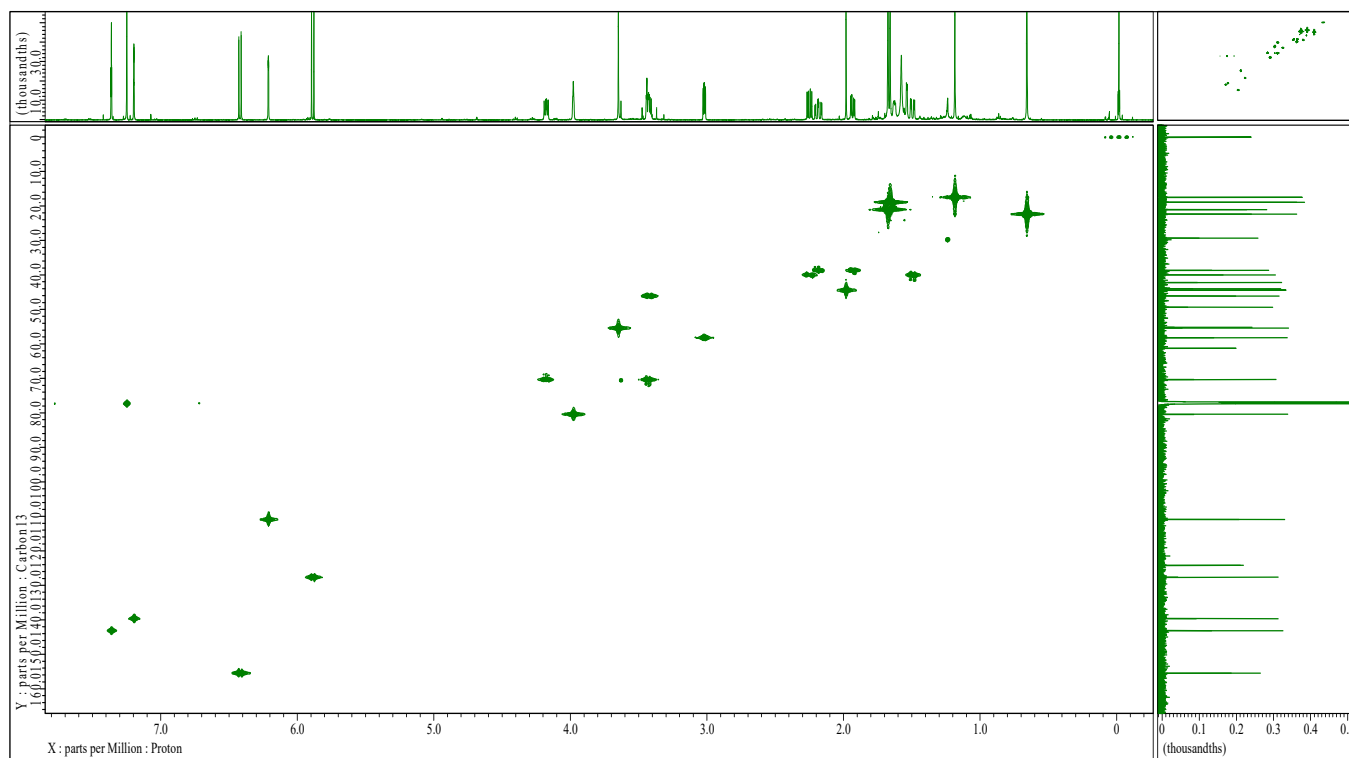

Figure S56. HMQC spectrum of compound **8** in  $\text{CDCl}_3$  at 600MHz

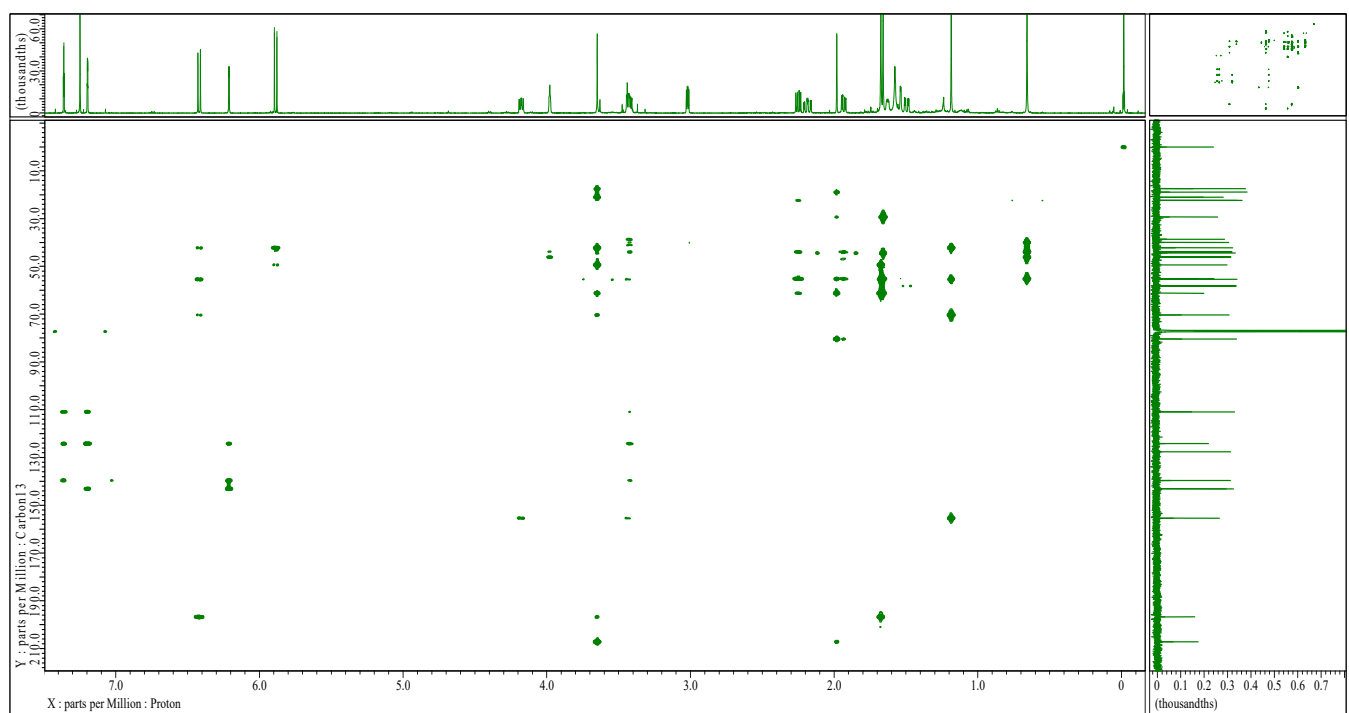

Figure S57. HMBC spectrum of compound **8** in  $\text{CDCl}_3$  at 600MHz



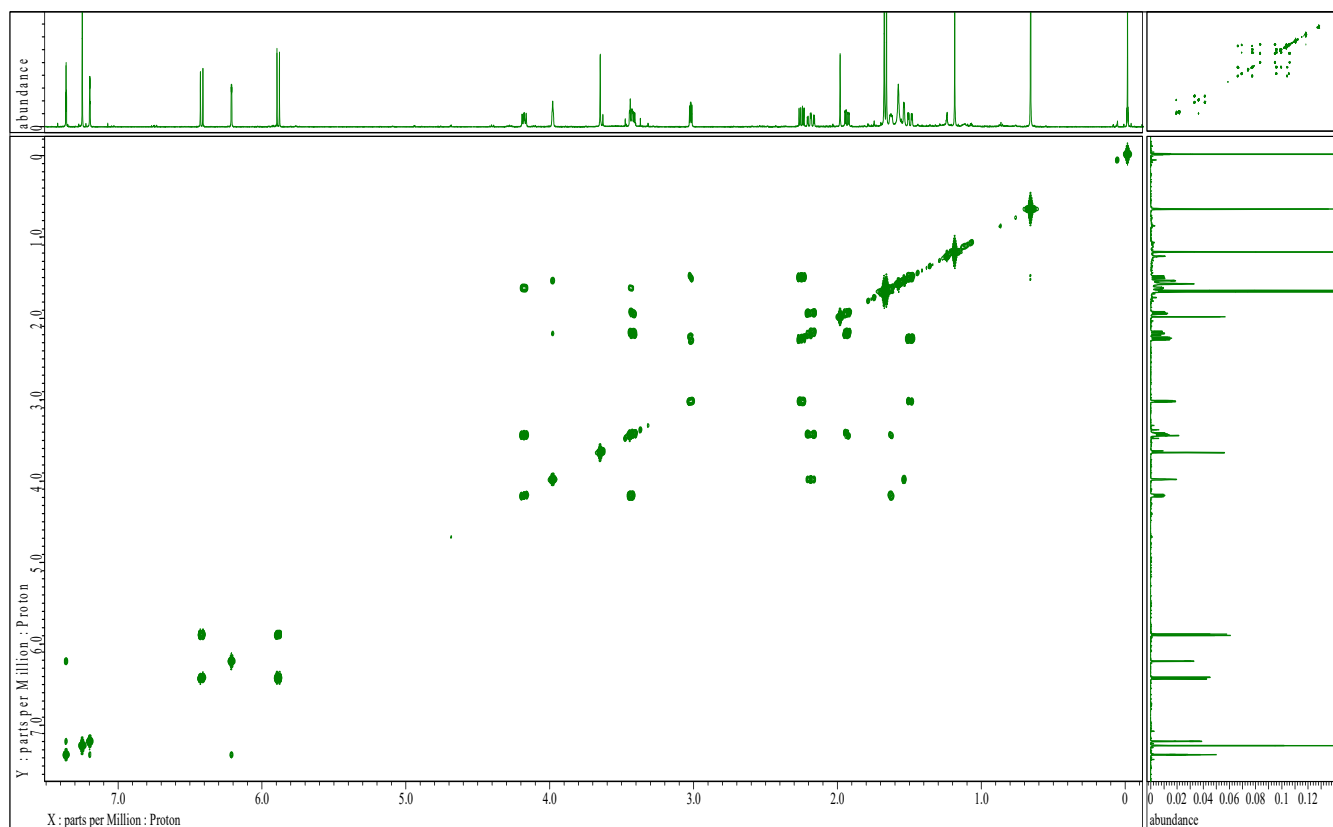

Figure S58. COSY spectrum of compound **8** in CDCl<sub>3</sub> at 600MHz

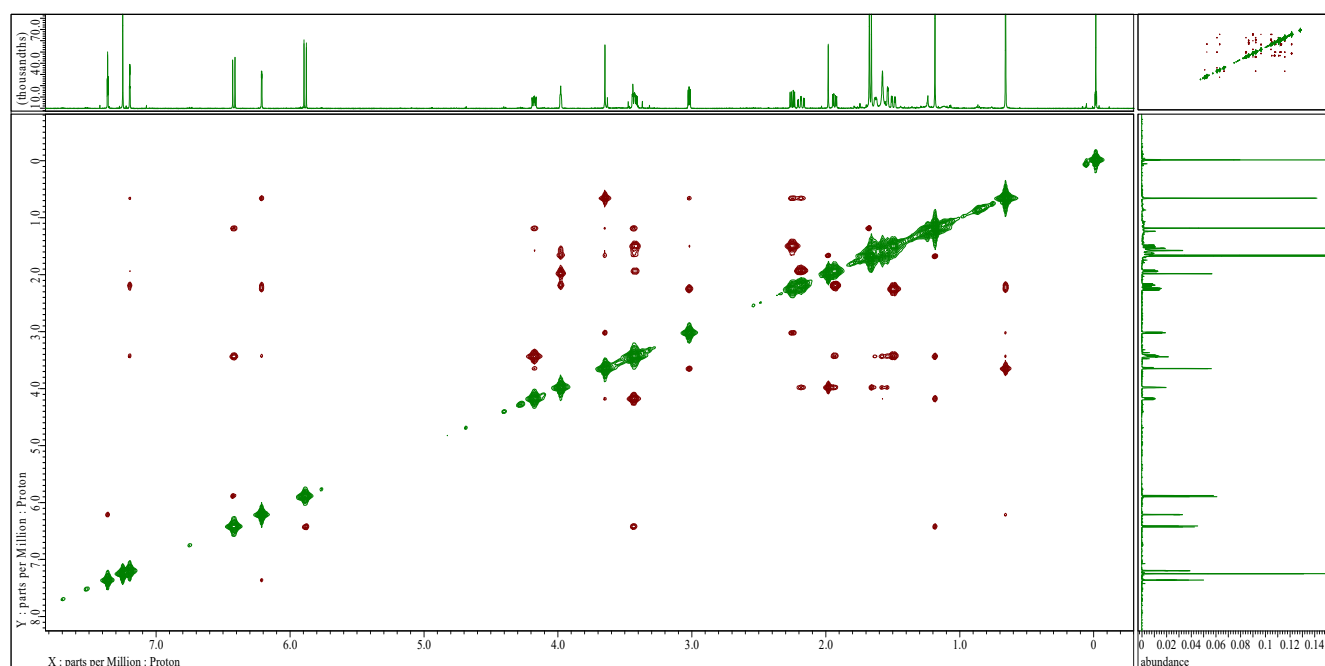

Figure S59. NOESY spectrum of compound **8** in CDCl<sub>3</sub> at 600MHz

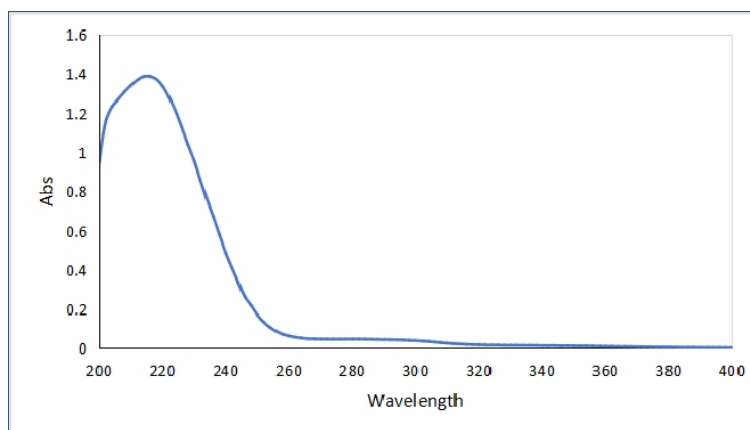

Figure S60. UV spectrum of compound **8** in MeOH

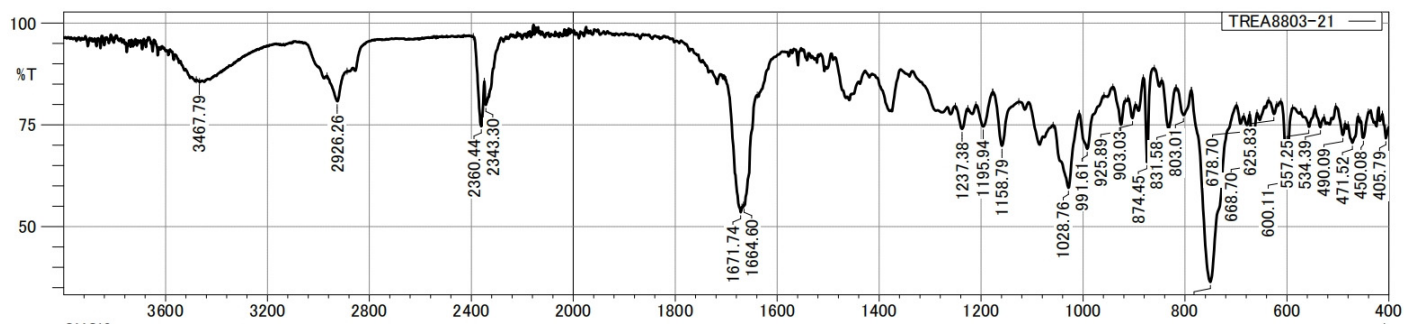

Figure S61. IR spectrum of compound **8**

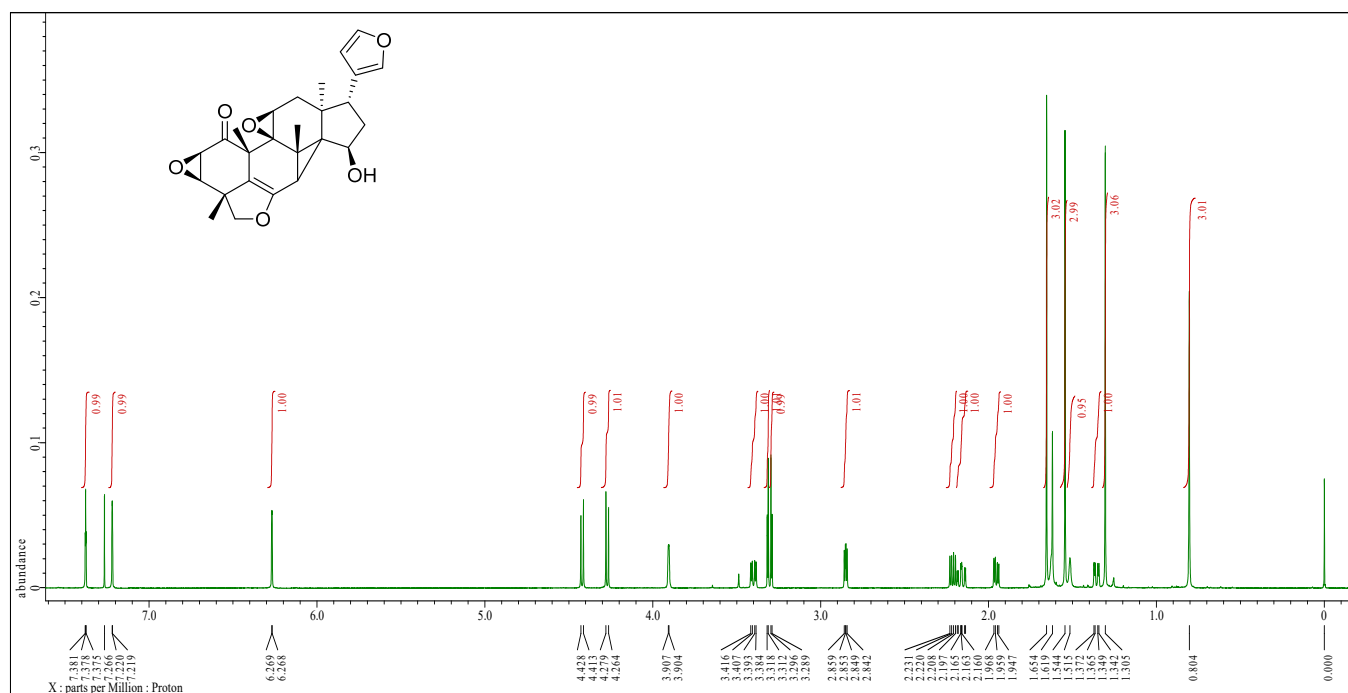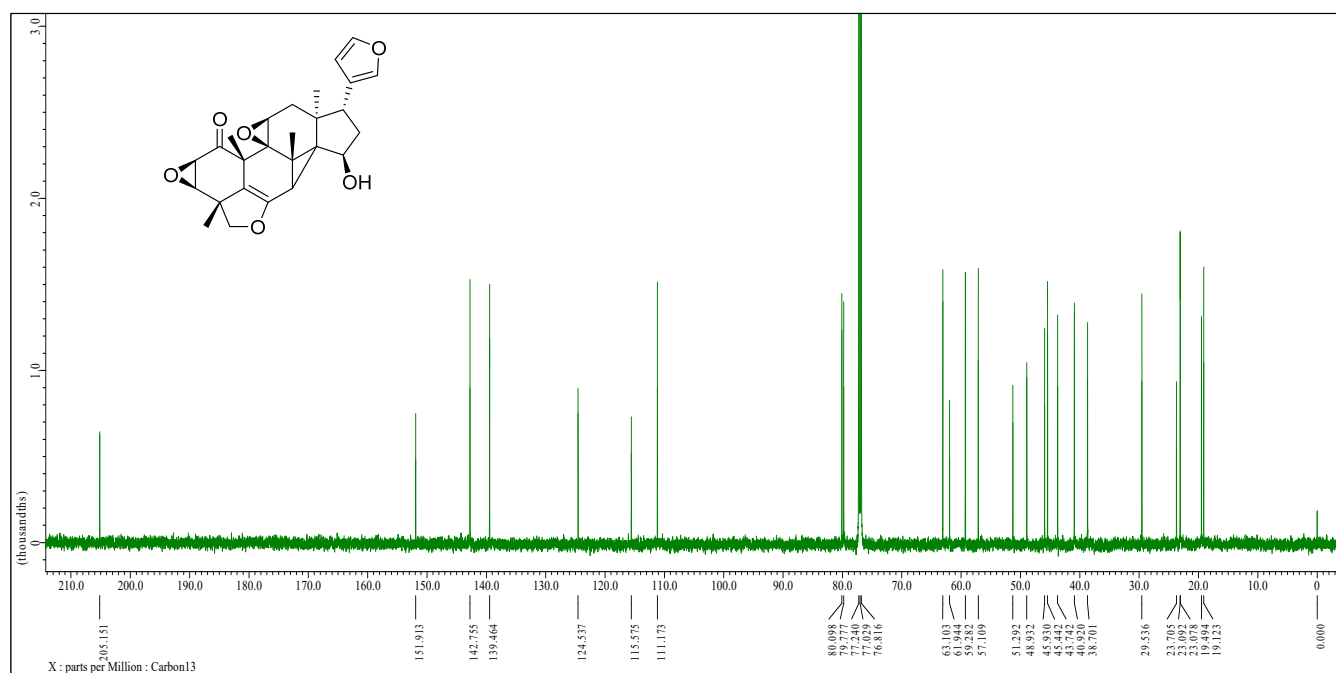

## LC/MS analysis of compound 1 and fraction 7.2

An authentic sample of compound **1** was diluted with acetonitrile/water (3:1) containing 0.1% formic acid to 10  $\mu$ M. A concentration of the fraction 7.2 was also prepared to 10  $\mu$ M with the same solvent, assuming an average molecular weight of compounds containing in the fraction as 500. The sample was subjected to LCMS-9030 (Shimadzu, Kyoto, Japan) connected with Candenza CX-C18 (2 x 50 mm, 3  $\mu$ m, Intakt, Kyoto, Japan). The mobile phases were solvent A: 0.1% formic acid in water, and solvent B: 0.1 % formic acid in acetonitrile. The gradient elution was performed as follows: 0–0.5 min, A90% /B5% ; 0.5–1.0 min, A90% /B10% B to A65% /B35% ; 1.0–5.0 min; A55% /B45%. The column temperature was maintained at 50°C, and the flow rate was 0.4 mL/min. The autosampler temperature was maintained at 4°C, and the injection volume was 3  $\mu$ L. The sample was ionized by atmospheric pressure chemical ionization (APCI) and the data were obtained in the positive ion mode with a centroid format at  $m/z$  100–1000 on a quadrupole time-of-flight (Q-TOF) mass spectrometer.

### Total ion chromatogram (TIC)

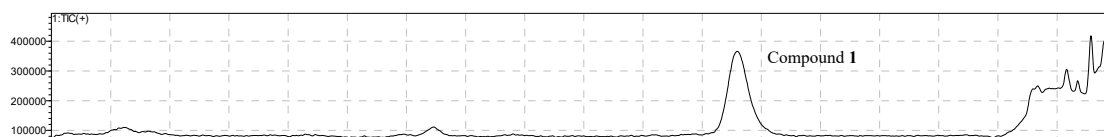

### IC of 595.1979–595.2219

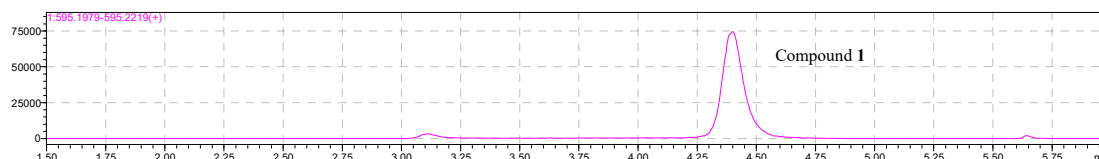

### Mass spectrum at 4.4 min.

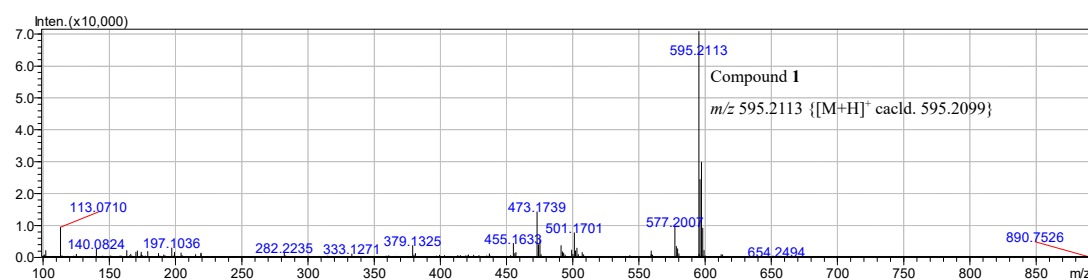

Figure S64. LC/MS analysis of compound **1**

TIC

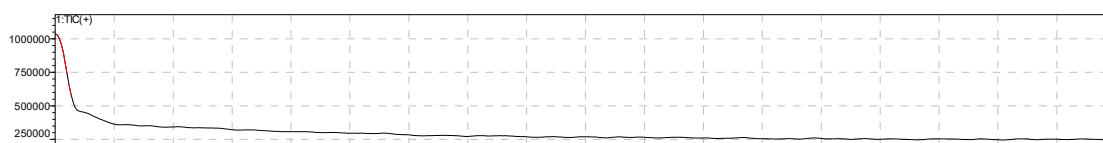

IC of 595.1979–595.2219

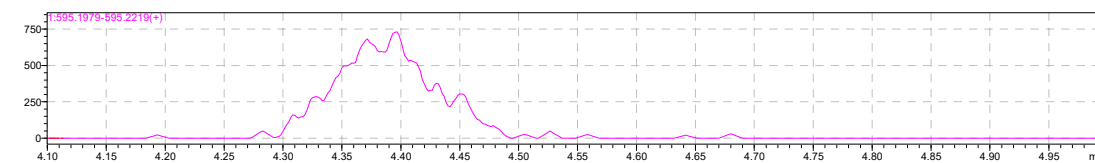

Mass spectrum at 4.4 min.

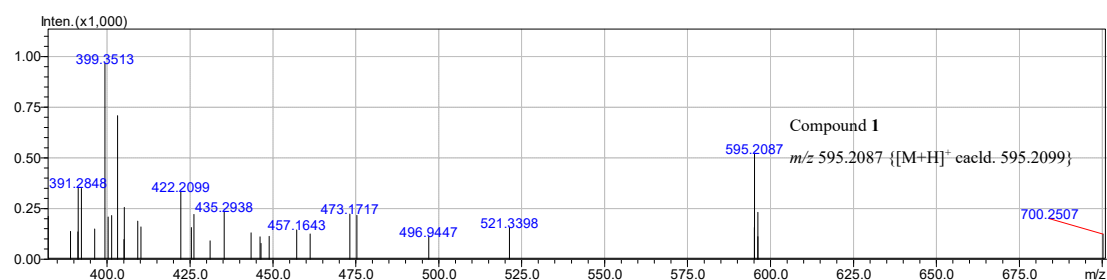

Figure S65. LC/MS analysis of fraction 7.2

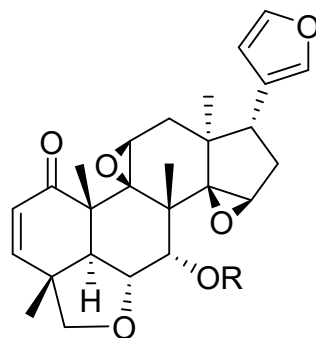

TS1 R= H

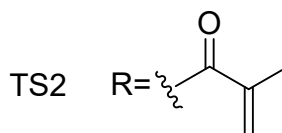

Figure S66. Structures of TS1 and TS2
